1 **Pollinators in food webs: Mutualistic interactions increase diversity,**  
2 **stability, and function in multiplex networks**

3 Kayla R. S. Hale<sup>1\*</sup>, Fernanda S. Valdovinos<sup>1,2</sup> & Neo D. Martinez<sup>3</sup>

4 <sup>1</sup>Department of Ecology and Evolutionary Biology, University of Michigan, 1105 North University  
5 Ave, Biological Sciences Building, Ann Arbor, MI 48109.

6 <sup>2</sup>Center for the Study of Complex Systems, University of Michigan, Weiser Hall Suite 700, 500  
7 Church St, Ann Arbor, MI 48109

8 <sup>3</sup>Department of Ecology & Evolutionary Biology, P.O. Box 210088, University of Arizona,  
9 Tucson, AZ 85721, USA

10 \*Correspondence to: Kayla R. S. Hale 1105 North University Ave, Biological Sciences Building,  
11 Ann Arbor, MI 48109. E-mail: [kaylasal@umich.edu](mailto:kaylasal@umich.edu)

12 **Classification:** Article

13 **Data Availability:** Simulation code will be available upon acceptance at the repository

14 <https://github.com/kayla-hale/Multiplex-Dynamics/>

15 **Author Contributions:** KRSH and NDM conceived of the study. KRSH and FSV formulated the  
16 model and designed the simulations. KRSH, FSV, and NDM designed the analyses and wrote the  
17 manuscript. KRSH performed the simulations and analysis.

18 **Expanded Material:** Supplementary Information with 11 supplementary figures and 4  
19 supplementary tables of additional analysis.

20 **Keywords:** food webs, pollination, ecological networks, dynamics, diversity, stability, ecosystem  
21 function

22 ABSTRACT

23 Ecosystems are composed of complex networks of many species interacting in different  
24 ways. While ecologists have long studied food webs of feeding interactions, recent studies  
25 increasingly focus on mutualistic networks including plants that exchange food for  
26 reproductive services provided by animals such as pollinators. Here, we synthesize both  
27 types of consumer-resource interactions to better understand the controversial effects of  
28 mutualism on ecosystems at the species, guild, and whole-community levels. We find that  
29 consumer-resource mechanisms underlying plant-pollinator mutualisms can increase the  
30 persistence, productivity, abundance, and temporal stability of both mutualists and non-  
31 mutualists in food webs. These effects strongly increase with floral reward productivity  
32 and are qualitatively robust to variation in the prevalence of mutualism and pollinators  
33 feeding upon resources in addition to rewards. This work advances the ability of  
34 mechanistic network theory to synthesize different types of interactions and illustrates how  
35 mutualism can enhance the diversity, stability, and function of complex ecosystems.

36

## 37 INTRODUCTION

38 As elegantly illustrated by Darwin's "tangled bank,"<sup>1</sup> ecosystems are complex,  
39 composed of many different types of interactions among many different species. However,  
40 theory has classically predicted that complexity in terms of the number and strength of  
41 interspecific interactions destabilizes ecological systems<sup>2</sup>. Mutualistic interactions like  
42 those between plants and their pollinators are thought to be particularly destabilizing<sup>3,4</sup>.  
43 Robert May famously emphasized this point by calling mutualism an "orgy of mutual  
44 benefaction" (pg. 95)<sup>5</sup> whose instability due to positive feedback loops helps explain why  
45 mutualism is infrequent and unimportant in natural systems<sup>3</sup>. Yet, mutualisms appear to  
46 be not only frequent but key to maintaining much of the biodiversity that drives ecosystems  
47<sup>6,7</sup>, especially agricultural ecosystems essential to human wellbeing<sup>8,9</sup>. Here, we address  
48 such disparities between theory and observation by developing and applying consumer-  
49 resource theory of feeding and reproductive mechanisms that integrates food webs and  
50 mutualistic networks into "multiplex" networks containing different types of interactions.  
51 We use our multiplex model to study how mutualism affects the diversity, stability, and  
52 function of complex ecosystems.

53 The integration pursued here benefits from long but largely separate traditions of  
54 research on feeding and mutualistic interactions<sup>8,10</sup>. For example, "mutualistic" feeding  
55 interactions between species with positive effects on each other (+,+), e.g. pollinators  
56 foraging on the nectar of flowering plants, are often excluded from food web data (e.g., ref  
57<sup>11</sup>), while "antagonistic" feeding interactions (+, -), e.g. herbivory and predation, are  
58 typically excluded from mutualistic networks<sup>12</sup>. Additionally, food web research has  
59 focused more on aquatic systems<sup>13</sup> where feeding interactions are strongly structured by

60 body mass or gape size<sup>13,14</sup>, while mutualism research has focused more on terrestrial  
61 systems where feeding interactions may be more strongly structured by other organismal  
62 traits like chemical defense and shape of mouth parts<sup>13-15</sup>. Within aquatic ecosystems, the  
63 allometric trophic network theory<sup>16,17</sup> of food webs has leveraged body-size considerations  
64 to successfully simulate the seasonal dynamics of many interacting species<sup>18,19</sup> and predict  
65 the quantitative effects of experimental species manipulations<sup>20-22</sup>. However, the failure of  
66 these predictions in the presence of facilitation (+, 0), e.g. habitat provisioning for mussels  
67 by barnacles, highlights the need for food-web theory to better address interactions with  
68 positive effects beyond nutrition<sup>20</sup>. Mutualistic network theory has focused on animal-  
69 mediated pollination, an interaction involving trophic and reproductive effects<sup>12,23</sup>,  
70 motivated in part by large agricultural and evolutionary significance<sup>9,24,25</sup>. Merging these  
71 distinct traditions requires a more unified approach that addresses several problems.

72         One significant problem is that classifying interactions based on positive and/or  
73 negative effects ignores logical inconsistencies such as when “antagonistic” herbivory or  
74 predation respectively increase plant fitness<sup>26</sup> or prey abundance<sup>27</sup> and when “mutualistic”  
75 pollinators parasitize plants by robbing their floral rewards without transferring pollen<sup>24</sup>.  
76 We resolve such conflicts by modelling mechanisms by which organisms interact and  
77 allowing effects to emerge from the interactions rather than asserting such effects *a priori*.  
78 We do this by developing consumer-resource theory that has long been applied to food web  
79 theory<sup>16,28</sup> and more recently applied to mutualistic interactions<sup>29,30</sup> with success  
80 predicting pollinators’ foraging preferences in the field<sup>31</sup>. Both feeding and mutualistic  
81 interactions typically involve food consumption while mutualistic interactions also often  
82 involve reproductive services provided by animals such as pollinators and seed dispersers

83 <sup>27,29,30</sup>. Positive, negative, and neutral interspecific effects dynamically emerge from the  
84 benefits and costs of participating in these interactions, which often both involve the same  
85 organisms and jointly determine much of the stability and function of ecosystems <sup>8,10,32–36</sup>.  
86 For example, feeding interactions such as parasitism and predation on pollinators,  
87 herbivory on animal-pollinated plants, and feeding by pollinators on animals and plant  
88 vegetation in addition to floral rewards such as nectar and pollen profoundly affect  
89 pollination dynamics, crop yields <sup>37</sup>, and long-term sustainability of agroecosystems <sup>38</sup>.

90         Another outstanding problem with understanding the joint effects of feeding and  
91 mutualistic interactions concerns contradictory conclusions of previous theoretical work.  
92 Classic “effects-based” theory has long held that mutualistic interactions are generally  
93 *destabilizing* (Table 1) especially at high complexity <sup>3,4</sup>. However, more recent theory  
94 finds that mutualisms *stabilize* ecological systems under conditions such as high levels of  
95 complexity of mutualism relative to antagonism in “merged” plant-pollinator and plant-  
96 herbivore networks <sup>35,39</sup>, low levels of complexity in hierarchical networks of all types of  
97 interactions <sup>40</sup>, or intermediate levels of mutualism when mutualistic links are randomly  
98 assigned and animals allocate effort to feeding and mutualistic interactions separately <sup>41–43</sup>.  
99 Contradictions among these findings may arise from different definitions of stability (i.e.  
100 local stability or persistence, Table 1) and network architectures <sup>4,41</sup> that often misrepresent  
101 empirically-observed structure <sup>40</sup>. A broader problem is that narrowly focusing on stability  
102 develops inefficient theory <sup>44</sup> that ignores how mutualisms alter the diversity, population  
103 dynamics, and overall functioning of complex ecosystems.

104         To more broadly understand the ecology of mutualistic interactions, here, we follow  
105 repeated calls to synthesize different types of interactions within networks <sup>8,10,32–36,45</sup> by

106 developing and applying mechanistic consumer-resource theory to “multiplex” ecological  
107 networks (Table 1) <sup>34,36</sup>. Our model based on this theory integrates the structure and  
108 dynamics of feeding and reproductive mechanisms from which effects of interspecific  
109 interactions emerge including predation (+, -), mutualism (+, +), and resource and apparent  
110 competition (-, -) <sup>46,47</sup>. We simulate network *dynamics* by extending Brose *et al.*'s  
111 allometric trophic network theory <sup>16</sup> to incorporate Valdovinos *et al.*'s theory of the  
112 exchange of food for reproductive services between plants and their pollinators (Fig. 1)  
113 <sup>30,31</sup>. We simulate network *structures* by integrating Williams and Martinez' “niche model”  
114 of food webs <sup>48</sup> with Thébault and Fontaine's model of mutualistic networks <sup>49</sup> (Fig. 2).  
115 Using this multiplex model, we investigate how the presence, prevalence, and intensity of  
116 mutualism affect multiple dimensions of ecological stability <sup>50</sup> by assessing diversity,  
117 persistence, dynamics, and function at the species, guild, and ecosystem levels.

## 118 RESULTS

### 119 **The multiplex model.**

120 We synthesize the *structure* and *dynamics* of feeding and reproductive interactions  
121 by integrating food webs and mutualistic networks and extending Allometric Trophic  
122 Network (ATN) theory <sup>16-18,20,51</sup> to include the consumption of floral rewards produced by  
123 plants and reproductive services produced by pollinators (Fig. 1, Methods). In addition to  
124 ATN theory's logistically growing “plants without pollinators,” “plants with pollinators” in  
125 our multiplex model must consume reproductive services produced by their pollinators to  
126 vegetatively grow. This involves partitioning the biomass of plants with pollinators into  
127 coupled pools of vegetation and floral rewards <sup>30</sup> that plants produce at an energetic cost  
128 <sup>33,52,53</sup>. The vegetative growth rate of plants with pollinators is a saturating function of

129 reproductive services consumed by the plants<sup>53</sup> determined by the quantity (consumption  
130 rate) and quality (fidelity) of pollinator visits<sup>30</sup> limited by community-wide carrying  
131 capacity<sup>18,51</sup>. The foraging rates and metabolic maintenance costs of all animals including  
132 pollinators scale allometrically with body size<sup>16</sup>.

133 We integrated realistic food-web and mutualistic-network structures into multiplex  
134 networks by generating 102 niche-model food webs<sup>48</sup> of  $S_f = 50$  species including exactly  
135 20 plant species (Fig. 2a, Methods) and 238 plant-pollinator networks<sup>49</sup> (Fig. 2b) of  
136 varying species diversity ( $S_p = A + P = 9, 12, \dots, 57$ ) and empirically-observed pollinator-  
137 to-plant ratio ( $A/P = 2$ ) and ranges of connectance and nestedness (S1). We pair each food  
138 web with each plant-pollinator network ( $N = 102 * 238 = 24,276$  pairs) and add the  
139 pollinators of each plant within the plant-pollinator network to its paired food web by  
140 linking the pollinators to a randomly selected plant species in the food web (Fig. 2c). Our  
141 Rewards Only (RO) treatment links only floral rewards to the pollinators (Fig. 2d). Our  
142 Rewards Plus (RP) treatment links floral rewards, vegetative biomass, and prey (Fig. 2e) to  
143 the pollinators. Pollinators are preyed upon by predators of herbivores in RO networks or  
144 predators of herbivores and low trophic-level omnivores in RP networks (Fig. 2d-e). As  
145 such, RO and RP treatments generate two different topological classes of multiplex  
146 networks for which we generate two groups of topologically-comparable food webs (RO  
147 FW and RP FW), described below.

148 Sensitivity and uncertainty analyses (S2) revealed a pivotal role of floral rewards in  
149 determining ecological effects of mutualism (Tables S1-S3, Fig. S5). We illustrate this role  
150 by presenting results from networks with High ( $\beta = 1.0$ ), Low ( $\beta = 0.2$ ), and no rewards  
151 productivity (Eqn. 4). High and Low productivities apply to both RO and RP multiplex

152 networks (High RO, Low RO, High RP, Low RP) containing both feeding and reproductive  
153 interactions. Treatments with no rewards productivity convert all feeding on rewards to  
154 feeding on the same plants' vegetative biomass and eliminate reproductive interactions  
155 resulting in networks with only traditional Food Web (FW) interactions where comparable  
156 plants with pollinators in multiplex networks instead grow as plants without pollinators and  
157 their former pollinators graze only on their plant partners' vegetation instead of floral  
158 rewards. This conversion transforms the added pollinators in multiplex networks into  
159 "added animals": herbivores in RO FW networks or herbivores and omnivores in RP FW  
160 networks (Fig. 2d, 2e). These two Food Web treatments (RO FW, RP FW) control for  
161 network structure, including the varying numbers and trophic levels of species and links in  
162 RO and RP networks, to help elucidate the effects of mutualism in multiplex networks.

163 By integrating food webs of fixed size with plant-pollinator networks of varying  
164 size, the initial diversity ( $S = 50 + \text{added animals} = 56, 58, \dots, 88$ ) of our 24,276 networks  
165 corresponds to prevalence of herbivory in our FW treatments or prevalence of mutualism in  
166 our multiplex treatments via the fraction of plants that are animal-pollinated and the  
167 fraction and number of species and links directly involved in mutualistic interactions (Fig.  
168 5a). This allows us to analyze our results in terms of increasing initial diversity ( $S$ ) for all  
169 treatments and increasing *prevalence* of mutualism for multiplex treatments. The *intensity*  
170 of mutualism in our treatments varies with rewards productivity (Table 1) from high (High  
171 RO, High RP) to low (Low RO, Low RP) to none (RO FW, RP FW). We simulate the  
172 24,276 networks subjected to these six treatments by initializing each species and pool of  
173 rewards with a biomass of 10 and recording results after 5000 timesteps when species have  
174 persisted or gone extinct and system dynamics are at, or close to, steady-state (Table 1, Fig.



175 3). We use these results to compare multiple measures of stability and function among  
176 treatments averaged over all initial diversity classes (Fig. 4) or within initial diversity  
177 classes (Figs. 5-6) at the species, guild, and ecosystem levels (Table 1). Below, we  
178 describe the effects of the presence, prevalence, and intensity of mutualism first on  
179 biodiversity, then on ecosystem function, and finally on temporal stability.

## 180 **Diversity.**

181 Multiplex networks with High rewards productivity (High RO, High RP) had higher  
182 average diversity (Fig. 4a) and persistence (Fig. 4b) than their counterparts with less (Low  
183 RO, Low RP) and no rewards productivity (RO FW, RP FW). Diversity and persistence  
184 were also slightly elevated in the Low RP compared to the corresponding RP FW  
185 treatment. Persistence decreased with increasing initial diversity and prevalence of  
186 mutualism in all treatments except High RO (Fig. 5c). However, these decreases were not  
187 strong enough to prevent overall increased final diversity (Fig. 5b) with increased initial  
188 diversity and mutualism (Fig. 5a) in all treatments. These results indicate that effects of  
189 mutualisms on biodiversity depend both on the prevalence and intensity of mutualism  
190 expressed as rewards productivity.

191 Since all 20 plant species nearly always persisted in all treatments (Fig. S1),  
192 differences in animal persistence among treatments underlie the overall patterns in  
193 diversity. Most notably, relatively high and increasing persistence of omnivores with  
194 mutualism (Fig. 5e) and consistently high persistence of added pollinators (Fig. 5f-g)  
195 doubled animal diversity in High RO and High RP treatments over that in FW, Low RO,  
196 and Low RP treatments (Fig. 5b). The few carnivores (~3 initial species) made smaller  
197 contributions to elevated diversity in High rewards treatments via substantial increases in

198 persistence with increasing mutualism (Fig. 5d). In contrast, FW and Low rewards  
199 treatments had much lower persistence of carnivores (Fig.5d), omnivores (Fig. 5e), and  
200 added animals (Fig. 5f-g) that, except for carnivores, decreased with increasing mutualism.  
201 In the High RO treatment, the few herbivores (~5 initial species) achieved higher  
202 persistence than in the corresponding FW (Fig. 5h). However, in the other multiplex  
203 treatments (Low RO, Low RP, High RP), herbivore persistence was lower and declined  
204 dramatically with increasing mutualism.

### 205 **Function.**

206 Similar to final diversity, the total biomass (Fig. 4c), productivity (Fig. 4d), and  
207 consumption in all multiplex treatments were comparatively higher than in FW treatments  
208 with some exceptions in the Low RO treatment. Specifically, biomass was up to twice as  
209 high while productivity and consumption were up to an order of magnitude higher in  
210 multiplex compared to FW treatments. The Low RO treatment also had higher biomass,  
211 but lower diversity, productivity, and consumption than the corresponding RO FW  
212 treatment (Fig. 4). Overall, this indicates that both the presence and intensity of pollination  
213 mutualisms increase key measures of ecosystem function.

214 In all treatments, total biomass (Fig. 6b), productivity (Fig. 6c), and consumption  
215 (Fig. 6d) increased with initial diversity and prevalence of mutualism, with the strongest  
216 increases occurring in the High rewards treatments. Plant biomass substantially decreased  
217 below carrying capacity (Fig. 6b) with increasing initial diversity in all but Low RO  
218 treatments, but these decreases were strongly compensated for by increases in the biomass  
219 of animals and floral rewards. As might be expected, biomass and productivity of  
220 pollinators, plants with pollinators, and rewards increased with increasing mutualism in

221 multiplex treatments. Concurrently, plant productivity increased with initial diversity and  
222 mutualism in all but Low RO treatments. Total consumption (Fig. 6d) in all treatments  
223 very closely matched total production (Fig. 6c) and was distributed similarly to that of  
224 animal species' biomass (Fig. 6b).

225         The higher biomass of multiplex compared to FW treatments was primarily due to  
226 increases in animal biomass (Fig. 6b), while differences in productivity were due to  
227 decreases in vegetative productivity coupled with strong increases in productivity of  
228 rewards and smaller increases in animals (Fig. 6c). These differences emerge primarily due  
229 to the interactive dynamics of rewards in which growth potential, unlike all other stocks of  
230 biomass, depends not on its own abundance but on the abundance of another component,  
231 i.e., the vegetative biomass of plants with pollinators (Methods, Eqn. 6). This allows  
232 rewards to be highly productive even when very rare whereas other network components  
233 would be unproductive or could even go extinct. In FW treatments, the overall weak  
234 increases in ecosystem biomass and strong increases in total productivity with increasing  
235 initial diversity emerge from increasing herbivore biomass that reduces plant vegetation  
236 below carrying capacity (Fig. 6b), freeing plants from competition. This increases plant  
237 productivity (Fig. 6c) and animal biomass enough to lead to small net increases in total  
238 biomass with initial diversity (Fig. 6b). Multiplex treatments experience similar decreases  
239 of plant biomass and corresponding increases in vegetative plant productivity (Fig. 6b-c),  
240 but rewards productivity dramatically increases as does animal biomass. These increases  
241 are mostly due to increases in pollinator abundance that stimulate rewards productivity by  
242 depleting rewards below their self-limitation threshold. Then, animal biomass and  
243 productivity are further elevated by increases in the biomass of omnivores and carnivores

244 that feed on the increasingly abundant pollinators. These patterns in production,  
245 consumption, and increased animal biomass are greatly enhanced in High rewards  
246 treatments.

### 247 **Stability.**

248 We evaluated the temporal stability of our networks by analyzing coefficients of  
249 variation ( $CV = \text{standard deviation} / \text{mean}$ ) of biomass during our simulations' final 1000  
250 timesteps for each species, for the sum of each species within each guild (Fig. 6f), and for  
251 the sum of each species within the ecosystem. We calculated a species-level CV for each  
252 guild by summing each species' CV within the guild and dividing by the number of species  
253 in the guild (Fig. 6e) and a species-level CV for each ecosystem by doing the same thing  
254 for all species within the network (Fig. 4e). We calculated a guild-level CV for each guild  
255 as the CV for the total biomass in each guild (Fig. 6f), and a guild-level CV for each  
256 ecosystem by summing all guilds' CVs and dividing by the number of guilds (standardized  
257 across treatments, Fig. 4f). Finally, we calculated an ecosystem-level CV as the CV of the  
258 total biomass of the ecosystem.

259 At the ecosystem level, all treatments were exceedingly stable ( $CV < 0.001$ ). In  
260 contrast, species on average were much more variable (Fig. 4e), especially in Low rewards  
261 treatments where plants with pollinators and their rewards contributed large amounts of  
262 variability (Fig. 6e). Large variability in plant and reward biomass in multiplex treatments  
263 was caused by the very low biomass of a few plant with pollinators species whose biomass  
264 decreased throughout the end of the simulations (e.g. Fig. 3). This low and decreasing  
265 biomass yields large CVs at the species level but contributes very little to guild-level  
266 variation (Fig. 6e-f) due to the tiny fraction of their guild's biomass comprised by these

267 very rare species. In FW treatments, where extinctions occur relatively early (Fig. S2),  
268 species-level and guild-level variation are comparable (Fig. 4e-f). In contrast, average  
269 guild-level variation (Fig. 4f) is only a fraction of the species-level variation (Fig. 4e) in  
270 multiplex treatments. Variation at both the species and guild levels decrease with initial  
271 diversity and mutualism in all treatments except for species-level variation in High RP  
272 networks where large decreases in animal variability only partly compensate for larger  
273 increases in rewards variability (Fig. 6e-f). High RP networks are by far the most stable at  
274 the guild level however, both on average (Fig. 4f) and with increasing mutualism (Fig. 6f).  
275 Overall, mutualism broadly stabilizes the dynamics of multiplex networks by reducing  
276 variability of animal populations compared to those in FWs.

#### 277 **Overall effects of mutualism.**

278       Excepting Low RO networks, multiplex treatments had higher average diversity,  
279 persistence, biomass, productivity, and consumption than their FW counterparts (Fig. 4).  
280 Multiplex treatments were also more temporally stable than FW treatments at the guild  
281 level and, for animal populations, at the species and guild levels. Interestingly, though Low  
282 RO networks displayed lower average diversity, persistence, productivity, and overall  
283 species-level stability than FW treatments, these effects were ameliorated in Low RP  
284 networks, in which pollinators had additional food available to them in the form of plant  
285 and animal resources. This suggests that the positive effects of mutualism are reasonably  
286 restricted to systems that provide sufficient food for mutualistic animals to survive (also see  
287 S2) and that the low persistence of the many added pollinators in Low RO networks (Fig.  
288 5g) throttles the positive effects of mutualisms from more generally increasing ecosystem  
289 diversity, function, and stability beyond that of FW treatments. These observations indicate

290 that intensity of pollination mutualisms in terms of rewards productivity is critical to  
291 positive effects of mutualism on ecosystems.

### 292 **Mutualistic feedbacks.**

293 We studied the degree to which mutualistic feedbacks affect ecosystems beyond  
294 broadly providing food for animals by developing “feedback controls.” At steady-state of  
295 the multiplex simulations, plants’ production of rewards interacts with their vegetative  
296 production and their pollinators’ consumption. These interactions emerge from the  
297 dynamic feedbacks between plants and pollinators whereby plants produce rewards, which  
298 pollinators consume while providing reproductive services, which increase vegetative  
299 growth rate, which affects vegetative biomass, which affects rewards productivity, etc. (see  
300 Fig. 1). Our feedback controls are non-mutualistic systems initialized with rewards and  
301 forced to produce rewards at rates seen in a steady-state mutualistic system, but without the  
302 mutualistic feedbacks (blue arrows in Fig. 1 removed). This allows us to test whether the  
303 additional biomass produced by plants with pollinators is the sole cause of diversity,  
304 stability, and function in our multiplex networks or whether sustained plant-pollinator  
305 feedbacks are required for these effects (Methods, S3).

306 The overall ecosystem diversity, persistence, biomass, and productivity in our  
307 feedback controls equilibrate to similar values as in the multiplex simulations (Fig. S7).  
308 However, ecosystem *composition* in controls differed from that of multiplex treatments.  
309 Eliminating dynamic feedbacks increased vegetative biomass of plants with pollinators,  
310 decreased biomass of plants without pollinators, and decreased persistence and biomass of  
311 omnivores and herbivores (Fig. S8). These guild-level differences were tiny in the High RP  
312 treatment but much larger in the RO and Low RP treatments. This pattern suggests that the

313 combination of sufficient rewards productivity and increased trophic connectedness of  
314 mutualists in High RP networks dampen mutualistic feedback effects.

315 Overall, our results suggest that the added productivity of mutualistic rewards drive  
316 our observations of ecosystem stability and function in the multiplex treatments (see S2).  
317 However, our results also suggest that the *dynamics* of mutualistic feedbacks alter the  
318 composition of ecosystems by increasing biomass and persistence of consumers,  
319 particularly omnivores, and decreasing biomass of plants with pollinators.

## 320 DISCUSSION

321 Our investigation of the effects of mutualism on the diversity, stability, and  
322 ecosystem function of realistically complex ecological networks used six treatments that  
323 varied the intensity (no, low, and high productivity of floral rewards) and prevalence  
324 (number and fraction of species directly involved in mutualisms) of mutualistic interactions  
325 between plants and their pollinators that either ate only floral rewards (rewards only, RO)  
326 or other sources of biomass in addition to floral rewards (rewards plus, RP). We found that  
327 adding more intense mutualisms strongly increases diversity, persistence, productivity,  
328 consumption, biomass, network complexity (number of species and interactions), and the  
329 temporal stability of biomass over that in networks with weaker or no mutualisms (Fig. 4).  
330 With a few exceptions, these effects increased with the prevalence of both strong and weak  
331 mutualisms (Fig. 5-6). Perhaps most strikingly, overall persistence increased with the  
332 prevalence of strong mutualisms involving RO pollinators (Fig. 5c, High RO). Temporal  
333 stability more generally increased in all six treatments with diversity and prevalence of  
334 mutualism at the levels of species (Fig. 6e) and guilds (Fig. 6f) except for the slightly  
335 negative relationship at the species-level in networks with strong mutualisms involving RP

336 pollinators (Fig. 6e, High RP). With one exception (Low RO productivity), networks with  
337 the most prevalent mutualistic interactions had higher abundance (Fig. 6b), productivity  
338 (Fig. 6c), and guild-level stability (Fig. 6d) than in corresponding networks with no  
339 mutualism.

340         These increases of stability and function due to increases in mutualism are broadly  
341 consistent with empirical observations of the effects of increased pollinator diversity in  
342 blueberry, watermelon, and other agroecosystems<sup>54–57</sup>. Though consistent with empirical  
343 observations, our results are unexpected in light of classic theory that mutualism decreases  
344 stability to small perturbations around assumed equilibria<sup>2–4</sup>, which we did not assess.  
345 Instead, we more comprehensively addressed both stability in terms of diversity,  
346 persistence, and biomass variability and also function in terms of productivity,  
347 consumption, and biomass abundance at species, guild, and ecosystem levels of  
348 organization (Table 1)<sup>50</sup>. Mutualism tends to increase stability and ecosystem function  
349 according to *all* of our measures in treatments with stronger mutualistic interactions and by  
350 several metrics in treatments with weaker mutualisms (Fig. 4).

351         Examining our results in more detail indicates that these strong positive effects of  
352 mutualism on ecosystems emerge because mutualistic rewards at Low and even more so at  
353 High productivity levels stabilize ecological networks by increasing persistence of  
354 omnivores (Fig. 5e), omnivorous pollinators (Fig. 5f), and carnivores (Fig. 5d) above that  
355 of comparable species in food webs of only feeding interactions (FW treatments). In  
356 contrast, pollinators that only consume rewards (RO treatments) exceed the persistence of  
357 comparable herbivores in FW treatments at High rewards productivity only. Our feedback  
358 controls show that these positive effects of mutualism are not fully reproduced by



359 traditional food web dynamics when supplementing food webs with rewards productivity  
360 similar to that in multiplex networks. The removal of dynamic feedbacks between  
361 pollinators and animal-pollinated plants alters species composition and abundance by  
362 reducing persistence and abundance of omnivores but increasing abundance of plants  
363 formerly dynamically partnered with pollinators (Fig. S7-8). Thus, the combination of  
364 dynamic feedbacks and mutualistic interaction strength, in terms of rewards productivity,  
365 lead to the increased stability and function we observed in our multiplex ecological  
366 networks.

367         Our theory embraces Levin’s assertion that “The key to prediction and  
368 understanding lies in the elucidation of mechanisms underlying observed patterns” (p.1943)  
369 <sup>58</sup> by using trophic and reproductive mechanisms underlying the observed structure and  
370 dynamics of multiplex networks to understand and predict how mutualism affects complex  
371 ecosystems. Previous theory obscures key dynamics of such mechanisms by assuming  
372 their effects <sup>23,47,59</sup>. For example, the few studies of ecological networks involving both  
373 feeding and mutualistic interactions assert species have constant per-capita direct effects on  
374 each other’s fitness or abundance <sup>36,45</sup>. Such effects can rarely be reproducibly measured  
375 due to, e.g., context-dependence and temporal variability <sup>59,60</sup>. We instead focused on  
376 mechanisms such as more reproducibly observed rates of production and consumption of  
377 food in terms of biomass <sup>18,61</sup> and reproductive services in terms of pollinator visits <sup>36</sup>. We  
378 also focused on more realistic (i.e., empirically-corroborated) network architectures – as  
379 have others with results similar to ours. For example, García-Callejas *et al.* <sup>40</sup> found that  
380 mutualism increases or leaves unaffected persistence of ecological networks containing  
381 different types of interactions structured according to realistic species abundance

382 distributions among different trophic levels. Several studies of near-equilibrium stability  
383 similarly find that destabilizing effects of mutualism may be overstated in models of fewer  
384 species<sup>32</sup> and interaction types<sup>41</sup> compared to more realistic ecological networks.  
385 However, unlike studies that require the “peculiar” constraint that animals’ interaction  
386 efforts are allocated separately between mutualistic and non-mutualistic interactions<sup>41–43</sup>,  
387 we find that mutualism is stabilizing according to empirically-relevant metrics (Table 1)  
388 when unpartitioned effort is allocated to both types of interactions.

389 Our multiplex treatments may bound the diet breadth of pollinators in the field by  
390 providing pollinators unrealistically few resources in RO networks and unrealistically many  
391 resources in RP networks. This suggests results intermediate between RO and RP networks  
392 may best predict empirical observations. For example, in both RO and RP treatments, High  
393 rewards productivity increases the persistence, biomass, and productivity on average of all  
394 consumer guilds over that in Low rewards networks (Figs. 5d-h, 6b-c) excepting the  
395 decrease in herbivore persistence in RP networks (Fig. 5h). This suggests that, in natural  
396 systems, we may expect the weakest increases in persistence, biomass, and productivity due  
397 to increased mutualism to occur among herbivores. The different effects of our treatments  
398 on herbivores may be due to RP pollinators’ additional herbivorous and carnivorous  
399 feeding links compared to RO pollinators. These additional links increase competition and  
400 predation pressure on herbivores by pollinators, omnivores, and carnivores. More broadly,  
401 our results suggest that, as the prevalence of pollination mutualisms increase, the diversity  
402 and biomass of upper trophic-level consumers will increase while our predictions for the  
403 effects on herbivores are less certain.

404 Key limitations of our work concern how the network architecture and bioenergetic  
405 parameters in our models match those seen in nature. While the multi-trophic and  
406 mutualistic components of our multiplex network structures correspond to empirical  
407 patterns, we lack observations of their interconnection into multiplex networks with which  
408 to test against our simulated networks<sup>8,45</sup>, though recent multiplex networks for rocky  
409 intertidal systems that include facilitation suggest progress in this direction<sup>36</sup>. Regarding  
410 dynamics, the metabolic rates of animals should be better related to the intrinsic  
411 productivities of plants. Most such estimates come from aquatic ecosystems that often  
412 differ from those in aboveground terrestrial systems<sup>13,14</sup>. The cryptic yet critically  
413 important rates determining reward availability are also only rarely estimated. For  
414 example, Baude *et al.*<sup>62</sup> suggest that nectar productivity of meadows in the UK can be up  
415 to ~5-10% of net primary productivity and Adgabe *et al.*<sup>63</sup> estimate nearly 1000 kg/ha of  
416 floral sugar is produced in a 5-month flowering season by a single tree species. Pollen  
417 production may significantly increase such estimates and accounting for seasonality of  
418 reward production and pollinator activity could greatly decrease estimates of resource  
419 demand needed to sustain pollinators. This highlights the need for improved theory of  
420 seasonal effects on both food webs<sup>18</sup> and mutualistic networks<sup>64</sup>. Bioenergetic costs of  
421 reward production compared to vegetation production should also be considered.  
422 Accounting for such anabolic efficiencies greatly increased the ability of allometric trophic  
423 network theory<sup>16,18,20</sup> to predict realistic stocks and flows of carbon and energy in complex  
424 food webs<sup>18,65</sup>. Compared to the relatively complex compounds that comprise vegetative  
425 biomass, efficiencies of synthesizing simple sugars that provide nearly all the usable energy  
426 in nectar may be much higher. Such efficiencies are suggested by estimates for animals  
427 that indicate, for example, the energetic efficiency of producing milk is almost six times

428 than that of beef<sup>66</sup>. Attending to these less studied aspects of the structure and function of  
429 multiplex networks may advance research on networks including plants and pollinators as  
430 well as those involving coral, mycorrhizal fungi, and frugivores that disperse seeds, all of  
431 which involve the exchange of autotrophic food for increased growth of primary producers.  
432 More broadly, our theoretical development shows how non-trophic effects can more  
433 generally include effects that directly depend on interaction *dynamics*, such as quality and  
434 quantity of pollinator visits, in addition to depending on the abundance of interactors as in  
435 previous work<sup>10,40,41,67</sup>.

436 We have advanced theory on multiplex networks in order to explore the effects of  
437 mutualism on ecological systems. Our focus on reproductive interactions follows previous  
438 extensions of allometric trophic network theory involving plant nutrients<sup>20</sup>, detritus<sup>18</sup>,  
439 ontogenetic niche shifts<sup>68</sup>, environmental stochasticity<sup>69</sup>, fishing<sup>51,68</sup>, economics<sup>51</sup> and  
440 other non-trophic effects<sup>67</sup> integrated into food webs comprised of feeding interactions  
441 distinguished by their relative body sizes<sup>16</sup> such as diseases<sup>11</sup>, parasites<sup>11,70</sup>, parasitoids<sup>11</sup>,  
442 and predators<sup>13</sup>. Such integration of multiple interaction types into multiplex networks is  
443 increasingly recognized as an effective means of accommodating different mechanisms  
444 responsible for ecosystem structure and function<sup>8,10,36,67</sup>. Our application to mutualistic  
445 mechanisms finds a striking ability of mutualism to enhance ecosystems including their  
446 diversity, stability, and function when mutualistic rewards suffice to sustain mutualistic  
447 partners. Further work incorporating mutualism into multiplex network theory (e.g.  
448 mutualisms between zooxanthellae and coral polyps or plants and mycorrhizal fungi) may  
449 illuminate whether mutualisms more generally enhance other systems. Such research  
450 would help compensate for ecologists' emphasis on competition by elucidating the much

451 less studied roles of mutualistic and other facilitative interactions <sup>24</sup> in biodiversity  
452 maintenance <sup>6</sup>, ecosystem function <sup>7</sup>, and evolution <sup>25</sup>.

## 453 METHODS

### 454 **Network architecture.**

455 We created multiplex networks (Fig. 2) by generating food webs using the “niche  
456 model” (Fig. 2a) parameterized with 50 species ( $S_f = 50$ ) and 10% directed connectance ( $C_f$   
457  $= L_f / S_f^2 = 0.1$  where  $L_f$  is the number of feeding links) <sup>48</sup>. The niche model stochastically  
458 assigns each species  $i$  three traits: (1) a niche value ( $n_i$ ) drawn randomly from a uniform  
459 distribution between 0 and 1, (2) a feeding range ( $r_i$ ) where  $r_i = xn_i$  and  $x$  is drawn from  
460 randomly from a beta distribution with expected value  $2C_f$  and (3) a feeding centre ( $c_i$ )  
461 drawn randomly from a uniform distribution between  $r_i/2$  and  $\min(n_i, 1 - r_i/2)$ . Species  $i$   
462 feeds on  $j$  if  $n_j$  falls within  $i$ 's feeding interval  $[c_i - r_i, c_i + r_i]$ . We selected niche-model  
463 food webs with  $0.0976 < C_f < 0.1024$  that were comprised of 50 species ( $S_f = 50$ ), of which  
464 exactly 20 were plants and five were herbivores that only feed on plants (i.e. have trophic  
465 level [TL] = 2), yielding 102 food webs. We also generated plant-pollinator networks  
466 using a stochastic model <sup>49</sup> with 3 to 19 plant-with-pollinator species ( $P$ ) and exactly twice  
467 as many animal-pollinator species ( $A = 2 * P$ ) to maintain pollinators' average resource  
468 availability in networks of increasing diversity. This yielded approximately 14 networks  
469 within each of 17 diversity classes ranging from 9 to 57 species ( $S_p = P + A = 9, 12, \dots, 57$ )  
470 for a total of  $14 * 17 = 238$  plant-pollinator networks that covered the empirically observed  
471 range of nestedness (Fig. 2b, see S1 for more details). We constrained the number of  
472 pollination links ( $L_p$ ) to ensure that pollination connectance ( $C_p = L_p / PA$ ) broadly  
473 decreased as  $S_p$  increased in an empirically realistic manner (Fig. S4a). We integrated each

474 of the 238 plant-pollinator networks with one of the 102 food webs yielding  $N = 238 \times 102 =$   
475 24,276 networks of increasing species diversity ( $S = S_f + A = 56, 58, \dots, 88$ ). We did this  
476 by randomly choosing  $P$  of the 20 plant species already in the food web and assigning the  $A$   
477 pollinators to those  $P$  plant species as determined by the plant-pollinator network (Fig. 2c).  
478 This leaves  $20 - P$  plant species without pollinators.

479 We linked pollinators to consumers in the food web in Rewards Only (RO)  
480 treatments by setting each pollinator's  $n_i$  to  $\pm 5\%$  of the  $n_i$  of a randomly selected (i.e.,  
481 non-omnivorous) strict herbivore ( $TL = 2$ ) from the food web (Fig. 2d). Pollinators'  $r_i$  and  
482  $c_i$  were set to zero. This causes pollinators to be preyed upon by predators similar to  
483 predators of herbivores and to consume only floral rewards as determined by the plant-  
484 pollinator network. Because the connectance ( $C_p$ ) of our simulated plant-pollinator  
485 networks decreases with increasing diversity ( $S_p$ ) and pollinators have no other resources in  
486 RO networks, connectance ( $C = L/S^2$ , where  $L$  is the total number of links) decreases on  
487 average from 0.091 to 0.06 as initial species diversity ( $S$ ) increases from 56 to 88 in the RO  
488 multiplex and corresponding Food Web (FW) treatments (Fig. S3). The Rewards Plus (RP)  
489 treatments link herbivorous and omnivorous pollinators to food webs (Fig. 2e) by setting  
490 each pollinator's  $n_i$ ,  $r_i$  and  $c_i$  to  $\pm 5\%$  of the corresponding  $n_i$ ,  $r_i$  and  $c_i$  of a randomly  
491 selected herbivore or omnivore that eats plants ( $2 \leq TL \leq 2.3$ ). This procedure maintains a  
492 constant average connectance ( $C = 0.102$ ) with increasing  $S$  (Fig. S3) among RP networks.  
493 Feeding on both vegetation and floral rewards of the same plant species allows two links  
494 between plants and pollinators in RP networks. The corresponding FW treatment has  
495 slightly less  $C$  than the RP multiplex network because the FW eliminates the link to

496 rewards and maintains only the herbivory link (Fig. 2d, Fig. S3). We ignore this issue to  
497 simplify comparisons between all treatments.

498 Overall, as initial species diversity ( $S$ ) increases, plants with pollinators in the  
499 multiplex networks increase from 3 to 19 of the 20 total plant species and mutualistic  
500 interactions increase from directly involving 16% to 65% of species in the networks.  
501 Correspondingly, initial herbivory in Food Web (FW) treatments increases from directly  
502 involving approximately half to three quarters of the species in the networks. We thus  
503 analyze how networks vary with *increasing initial diversity*, which corresponds to  
504 *increasing prevalence of mutualism* in multiplex treatments or *increasing herbivory* in FW  
505 treatments.

#### 506 **Network dynamics.**

507 To model multiplex dynamics, we extended Allometric Trophic Network (ATN)  
508 theory<sup>16,18,20,51</sup> by integrating a consumer-resource approach to pollination mutualisms in  
509 which pollinators feed on floral rewards ( $R$ ) and plants consume reproductive services  
510 produced by plants<sup>30,31</sup>. Plants benefit from pollinators depending upon on the quantity  
511 and quality of pollinators' visits in terms of the rate at which pollinators consume plants'  
512 rewards and the fidelity of pollinators' visits to conspecific plants<sup>30,31</sup>. Pollinators in RP  
513 treatments also feed on species' biomass according to ATN theory.

514 More specifically, ATN theory models the change in biomass  $B_i$  over time  $t$  for  
515 consumer  $i$  as

$$516 \quad \frac{dB_i}{dt} = \sum_{j \in \text{resources}} C_{ij}(B_j) - x_i B_i - \sum_{j \in \text{consumers}} C_{ji}(B_i)/e_{ji} \quad (1)$$

517 where  $x_i$  is the allometrically-scaled mass-specific metabolic rate of species  $i$  and  $e_{ji}$  is the  
518 assimilation efficiency of species  $j$  eating  $i$ .  $C_{ij}$  is the rate of species  $i$  assimilating  $B_j$ , the  
519 biomass of species  $j$ :

$$520 \quad C_{ij}(B_j) = x_i y_{ij} B_i F_{ij}(B_j) \quad (2)$$

521 where  $y_{ij}$  is the maximum consumption rate per metabolic rate.  $F_{ij}(B_j)$  is the functional  
522 response of  $i$  eating  $j$ :

$$523 \quad F_{ij}(B_j) = \frac{\omega_{ij} B_j^h}{B_{0ij}^h + \sum_{k \in \text{resources}} \omega_{ik} B_k^h} \quad (3)$$

524 where  $\omega_{ij}$  is  $i$ 's relative preference for  $j$ ,  $h$  is the Hill coefficient <sup>71</sup>, and  $B_{0ij}$  is the “half-  
525 saturation” density of resource  $j$  at which  $i$ 's consumption rate is half  $y_{ij}$  <sup>18</sup>. The form of the  
526 preference term,  $\omega_{ij}$ , determines if a trophic generalist ( $i$ ) is treated either as a “strong  
527 generalist” ( $\omega_{ij} = 1$ ) or “weak generalist” ( $\omega_{ij} = 1/(\# \text{ of species in } i\text{'s diet})$  <sup>72</sup>. Here, we  
528 present results only for weak generalists that search for each of their resources equally even  
529 if one or more of their resources are extinct. Eqn. 3 is a Type II functional response when  $h$   
530 = 1 and a Type III response when  $h = 2$ . We use  $h = 1.5$  for a weak Type III response <sup>71</sup>.

531 We use ATN theory's logistic growth model <sup>18</sup> to simulate biomass dynamics of  
532 plants without pollinators as:

$$533 \quad \frac{dB_i}{dt} = \left(1 - \frac{1}{K} \sum_{j \in \text{plants}} B_j\right) r_i B_i - \sum_{j \in \text{consumers}} C_{ji}(B_i) / e_{ji} \quad (4)$$

534 where  $r_i$  is the maximum mass-specific growth rate of plant  $i$ , and  $K$  is the carrying capacity  
535 of the plant community. For plant with pollinators  $i$  (Fig. 1), we model its vegetative  
536 biomass dynamics as:



$$537 \quad \frac{dB_i}{dt} = \left(1 - \frac{1}{K} \sum_{j \in \text{plants}} B_j\right) r_i B_i P(R_i) - \sum_{j \in \text{consumers}} C_{ji}(B_i)/e_{ji} - \kappa_i(\beta_i B_i - s_i R_i) \quad (5)$$

538 and the dynamics of its floral rewards biomass as:

$$539 \quad \frac{dR_i}{dt} = \beta_i B_i - s_i R_i - \sum_{j \in \text{pollinators}} C_{ji}(R_i)/e_{ji} \quad (6)$$

540 where  $\beta_i$  is the production rate of floral rewards,  $s_i$  is the self-limitation rate of floral reward

541 production, and  $\kappa_i$  is the cost of producing rewards in terms of total vegetative growth.

542  $P(R_i)$  is the functional response describing how benefit to  $i$  accrues due to reproductive

543 services provided by  $i$ 's pollinators:

$$544 \quad P(R_i) = f\left(\overbrace{\sum_{j \in \text{pollinators}} \overbrace{C_{ji}(R_i)}^{\text{quantity}} \frac{\overbrace{C_{ji}(R_i)}^{\text{quality}}}{\sum_{k \in \text{resources}} C_{jk}(B_k \text{ or } R_k)}}^{\text{reproductive services}}}\right) \quad (7)$$

545 which is a function of the quantity and quality of pollination visits by pollinator  $j$ . Quantity

546 is  $j$ 's consumption rate on  $i$ 's floral rewards. Quality is  $j$ 's consumption of  $i$ 's rewards as

547 compared to  $j$ 's consumption of all the resources it consumes. Quality is therefore  $j$ 's

548 relative consumption rate of  $i$ 's floral rewards, a measure of  $j$ 's fidelity that ensures more

549 specialist pollinators typically provide higher quality services than generalist pollinators by,

550 for example, depositing higher concentrations of conspecific pollen<sup>30</sup>. The form of the

551 functional response describing benefit accrual due to pollination ( $f$ ) reflects the assertion

552 that reproductive services saturate<sup>53</sup> at 1 according to:  $\text{reproductive services} / (0.05 +$

553  $\text{reproductive services})$ . As  $P(R_i)$  approaches 1, the realized growth rate of plant with

554 pollinators  $i$ 's vegetative component approaches  $r_i$ , its maximum growth rate.

555 Pollinators follow the dynamics typical of ATN consumers (Eqn. 1) with the  
556 exception that they access rewards biomass  $R_i$  instead of  $B_i$  in RO treatments (Eqn. 1-1) or  
557 in addition to the biomass of other resource species (Eqn. 1-2) in RP treatments:

558 
$$\frac{dB_i}{dt} = \sum_{j \in \text{resources}} C_{ij}(R_j) - x_i B_i - \sum_{j \in \text{consumers}} C_{ji}(B_i)/e_{ji} \quad (1-1)$$

559 
$$\frac{dB_i}{dt} = \sum_{j \in \text{resources}} C_{ij}(R_j \text{ and } B_j) - x_i B_i - \sum_{j \in \text{consumers}} C_{ji}(B_i)/e_{ji} \quad (1-2)$$

### 560 **Parameterization.**

561 Vital rates for consumers follow previously described allometric scaling for  
562 invertebrates<sup>51</sup>. Specifically, we set plant species' "body mass" to a reference value ( $m_i =$   
563 1)<sup>16</sup> and calculated consumers' body mass as  $m_i = Z_i^{swTL_i - 1}$ , where  $swTL_i$  is  $i$ 's short-  
564 weighted trophic level<sup>73</sup> and  $Z_i$  is  $i$ 's average consumer-resource body size ratio sampled  
565 from a lognormal distribution with mean = 10 and standard deviation = 100. Then, for  $i$   
566 eating  $j$ ,  $i$ 's mass-specific metabolic rate ( $x_i$ ) is  $0.314m_i^{-0.25}$ , its maximum consumption rate  
567 per metabolic rate ( $y_{ij}$ ) is 10, and its assimilation efficiency ( $e_{ij}$ ) is 0.85 if  $j$  is an animal or  
568 0.66 if  $j$  is plant vegetation. We set the maximum mass-specific growth rate ( $r_i$ ) of plant  $i$   
569 to be 0.8 for plants without pollinators or 1.0 for plants with pollinators, so that when  
570 sufficient reproductive services are provisioned by pollinators, the mass-specific growth  
571 rate of plants with pollinators is comparable or can even exceed that of the plants without  
572 pollinators.

573 The remaining parameters are not allometrically constrained. We assigned a "half-  
574 saturation" density for consumers of species' biomass or rewards of  $B_0 = 60$  or 30,  
575 respectively. This reflects the decreased "handling time" for rewards compared to typically  
576 more defended vegetation. We also assigned a Hill coefficient of  $h = 1.5$ , a community-

577 wide carrying capacity for plant vegetative biomass of  $K = 480$ , and an assimilation  
578 efficiency of  $e_{ij} = 1.0$  for pollinator species  $i$  consuming the floral rewards of  $j$ . For plants  
579 with pollinators, we used a rewards production rate of  $\beta_i = 0.2$  or  $1.0$  (Low or High rewards  
580 productivity treatments, respectively), a self-limitation rate of  $s_i = 0.4$ , and a vegetative cost  
581 of rewards production of  $\kappa_i = 0.1$ . In FW treatments, rewards are zeroed out ( $R_i = \beta_i = 0$ )  
582 and all plants are parameterized so that they behave as plants without pollinators while  
583 pollinators are parameterized as “added animals” (herbivores or omnivores) that consume  
584 vegetation with the associated lower assimilation efficiency ( $e_{ij} = 0.66$ ) but have otherwise  
585 unchanged vital rates. See Table S4 for a summary of model parameters and values.

#### 586 **Simulations.**

587 We simulated each of our  $N = 24,276$  networks subjected to each six treatments  
588 (High RO, Low RO, RO FW, High RP, Low RP, and RP FW) for a total of 145,656  
589 simulations. We used MATLAB’s <sup>74</sup> differential equation solvers (ode15s for the multiplex  
590 treatments and ode45 for FWs) to simulate these networks for 5000 timesteps (Fig. 3). By  
591 2000 timesteps, the simulations were approximately at dynamical steady-state, which we  
592 assessed through small changes in persistence with increased simulation length. More  
593 specifically, persistence decreased by 5% on average between 2,000 and 500,000 timesteps  
594 in a sample of 90 networks from each treatment (Fig. S2). We initialized all biomasses ( $B_i$   
595 and  $R_i$ ) to 10 and used an extinction threshold of  $B_i < 10^{-6}$ . Statistical analyses were  
596 performed in JMP 14 <sup>75</sup>. Our results are qualitatively robust to simulation length (Fig. S2).  
597 Sensitivity of our results to parameter variation are reported in the Supplementary  
598 Information (Tables S1-S3) and qualitative effects of each parameter are summarized in  
599 Table S2.

600 **Outputs.**

601 We quantified ecosystem stability and function using species persistence, biomass,  
602 productivity, consumption, and variability at or near the end of the simulations, when the  
603 dynamics were approximately at steady state (Table 1). We calculated these metrics for the  
604 whole ecosystem (Fig. 4) and for seven guilds of species (Figs. 5-6). Two guilds are self-  
605 evidently described as species of plants without pollinators and plants with pollinators.  
606 Herbivores, omnivores, and carnivores refer only to species present in the niche-model food  
607 webs prior to integrating animals from plant-pollinator networks in Fig. 2c. Herbivores eat  
608 only vegetative biomass. Omnivores eat vegetation and animals. Carnivores eat only  
609 animals. The meanings of the two remaining guilds (collectively referred to as the “added  
610 animals”) depend on the treatment that adds them to the food web. Added  
611 herbivores/pollinators refer to herbivores added by the FW treatments, pollinators added by  
612 the RO or RP multiplex treatments that consume only rewards, and pollinators added by the  
613 RP multiplex treatment that consume rewards and vegetation. Added  
614 omnivores/pollinators refer to omnivores added by the RP FW treatment and analogous  
615 pollinators added by the RP multiplex treatment that consume rewards, other animals, and  
616 potentially vegetation. When relevant (e.g. in Fig. 6), we considered the rewards biomass  
617 of all plants with pollinators as an eighth guild.

618 We calculated all outputs at the end of the simulations (timestep 5000) except for  
619 biomass variability, which we calculated over the last 1000 timesteps. Final diversity and  
620 persistence are the *number* and the *fraction*, respectively, of the initial species whose  
621 biomass stayed above the extinction threshold throughout the simulation. Biomass  
622 abundance, productivity, and consumption are calculated as summed totals for the whole

623 ecosystem and/or each guild of species. Plant productivity is the rate of biomass increase  
624 due to growth minus loss due to rewards production. Rewards productivity is the rate  
625 rewards production minus self-limitation. Animal productivity is the rate of biomass  
626 increase due to assimilation minus losses due to metabolic maintenance. Consumption is  
627 the rate of biomass assimilated by consumers divided by assimilation efficiency. Species-  
628 level variability for the whole ecosystem (Fig. 4e) is the averaged coefficients of variation  
629 of biomasses ( $CV = \text{standard deviation} / \text{mean}$ ) of all surviving species in the ecosystem.  
630 Species-level variability for each guild (Fig. 6e) is the averaged CVs of all surviving  
631 species within that guild. Guild-level variability for each guild (Fig. 6f) is the CV of the  
632 summed biomass of all species in that guild. Guild-level variability of the whole ecosystem  
633 (Fig. 4f) is the averaged CVs for five guilds (all plants, herbivores, all added animals,  
634 omnivores, and carnivores), which standardizes the grouping of species into guilds across  
635 treatments. Ecosystem-level variability (not shown) is the CV of the summed biomass of all  
636 species in the ecosystem.

### 637 **Feedback control.**

638 To disentangle effects of mutualistic feedbacks from effects of floral rewards, we  
639 ran multiplex simulations with mutualism “turned off” (“feedback control”), in which all  
640 feedbacks (blue arrows in Fig. 1) between vegetation, rewards, and pollinators are severed.  
641 This control transforms plants with pollinators into two *independent* biomass pools: a plant-  
642 without-pollinators (vegetation) pool and a rewards pool, both with constant production  
643 rates. In this way, rewards production is forced to match that of the multiplex model in the  
644 absence of mutualistic feedbacks even though these feedbacks also generated the

645 production rate through dynamics over the course of the multiplex simulations. All feeding  
646 interactions (gray arrows) remain the same.

647 Specifically, we modified the dynamics of each former plant with pollinators  $i$  so  
648 that its vegetative biomass follows the dynamics and parametrization of plants without  
649 pollinators (Eqn. 4,  $r_i = 0.8$ ) and its rewards biomass follows:

$$650 \quad \frac{dR_i}{dt} = (\overline{\beta_i B_i - s_i R_i}) - \sum_{j \in \text{pollinators}} C_{ji}(R_i)/e_{ji} \quad (6-1)$$

651 with fixed production rate  $(\overline{\beta_i B_i - s_i R_i})$  equal to  $i$ 's average net rewards production during  
652 the last 1000 timesteps of the multiplex simulations. In this manner, vegetation is not  
653 dependent upon pollinator consumption of rewards nor on rewards production, and rewards  
654 production is fixed and not dependent upon vegetation. All other species followed the  
655 same dynamic equations and parameterization as in the multiplex simulations.

656 We applied these feedback controls to the four multiplex treatments (RO Low, RO  
657 High, RP Low, RP High) and initialized all species at biomass  $B_i = 10$  and rewards nodes at  
658  $R_i = \overline{R_i}$ , the average rewards biomass for each plant with pollinator species  $i$  during the last  
659 1000 timesteps of the multiplex simulations. Simulations were run for 5000 timesteps to  
660 approximate steady state. We compared the results of these simulations with those of the  
661 original multiplex simulations by measuring absolute differences in persistence and total  
662 biomass at timestep 5000, where the *effect of feedback* = *multiplex* – *control*. To assess  
663 differences in these ecosystem metrics due to guilds, we calculated absolute differences in  
664 the fraction of persisting species composed by each guild:

$$665 \quad \frac{\text{multiplex final guild diversity}}{\text{multiplex final diversity}} - \frac{\text{control final guild diversity}}{\text{control final diversity}} \quad (8)$$

666 and the fraction of ecosystem biomass composed by each guild:

$$667 \quad \frac{\text{multiplex guild biomass}}{\text{multiplex total biomass}} - \frac{\text{control guild biomass}}{\text{control total biomass}} \quad (9)$$

668 If these *effects of feedbacks* evaluate to positive numbers, feedbacks in multiplex  
669 simulations have a positive effect, i.e. they increase persistence or biomass of the  
670 ecosystem or guild. If *effects of feedbacks* are negative, feedbacks decrease persistence or  
671 biomass. If, instead, *effects of feedbacks* are approximately zero, stability and function in  
672 our multiplex treatments can be attributed to the overall rates of plant (vegetative and  
673 rewards) productivity that emerge during those simulations.

#### 674 **Data availability.**

675 Network structures and simulation outputs are available in the online repository at  
676 <https://github.com/kayla-hale/Multiplex-Dynamics/>.

#### 677 **Code availability.**

678 Simulation and analysis code are available in the online repository at  
679 <https://github.com/kayla-hale/Multiplex-Dynamics/>.

680 REFERENCES

- 681 1. Darwin, C. *On the Origin of the Species*. Darwin (1859). doi:10.1016/S0262-  
682 4079(09)60380-8
- 683 2. May, R. M. Will a large complex system be stable? *Nature* **238**, 413 (1972).
- 684 3. May, R. M. Stability and complexity in model ecosystems. *Monogr. Popul. Biol.*  
685 (1973). doi:10.1109/TSMC.1978.4309856
- 686 4. Allesina, S. & Tang, S. Stability criteria for complex ecosystems. *Nature* **483**, 205–  
687 208 (2012).
- 688 5. May, R. M. Patterns in multi-species communities. in *Theoretical ecology:*  
689 *principles and applications* (Blackwell, 1981).
- 690 6. Bruno, J. F., Stachowicz, J. J. & Bertness, M. D. Incorporating facilitation into  
691 ecological theory. *Trends Ecol. Evol.* **18**, 119–125 (2003).
- 692 7. Wright, A. J., Wardle, D. A., Callaway, R. & Gaxiola, A. The Overlooked Role of  
693 Facilitation in Biodiversity Experiments. *Trends Ecol. Evol.* **32**, 383–390 (2017).
- 694 8. Fontaine, C. *et al.* The ecological and evolutionary implications of merging different  
695 types of networks. *Ecol. Lett.* **14**, 1170–1181 (2011).
- 696 9. Ollerton, J. Pollinator Diversity: Distribution, Ecological Function, and  
697 Conservation. *Annu. Rev. Ecol. Evol. Syst.* **48**, annurev-ecolsys-110316-022919  
698 (2017).
- 699 10. Kéfi, S. *et al.* More than a meal... integrating non-feeding interactions into food



- 700 webs. *Ecol. Lett.* **15**, (2012).
- 701 11. Memmott, J., Martinez, N. D. & Cohen, J. E. Predators, parasites and pathogens:  
702 species richness, trophic generality, and body sizes in a natural food web. *Anim.*  
703 *Ecol.* **69**, 1–15 (2000).
- 704 12. Bascompte, J., Jordano, P., Melian, C. J. & Olesen, J. M. The nested assembly of  
705 plant-animal mutualistic networks. *Proc. Natl. Acad. Sci.* **100**, 9383–9387 (2003).
- 706 13. Brose, U. *et al.* Predator traits determine food-web architecture across ecosystems.  
707 *Nat. Ecol. Evol.* **3**, 919–927 (2019).
- 708 14. Shurin, J. B., Gruner, D. S. & Hillebrand, H. Review All wet or dried up? Real  
709 differences between aquatic and terrestrial food webs. *Proc. R. Soc. B Biol. Sci.* **273**,  
710 1–9 (2006).
- 711 15. Eklöf, A. *et al.* The dimensionality of ecological networks. *Ecol. Lett.* **16**, 577–583  
712 (2013).
- 713 16. Brose, U., Williams, R. J. & Martinez, N. D. Allometric scaling enhances stability in  
714 complex food webs. *Ecol. Lett.* **9**, 1228–1236 (2006).
- 715 17. Otto, S. B., Rall, B. C. & Brose, U. Allometric degree distributions facilitate food-  
716 web stability. *Nature* **450**, 1226–1229 (2007).
- 717 18. Boit, A., Martinez, N. D., Williams, R. J. & Gaedke, U. Mechanistic theory and  
718 modelling of complex food-web dynamics in Lake Constance. *Ecol. Lett.* **15**, 594–  
719 602 (2012).

- 720 19. Hudson, L. N. & Reuman, D. C. A cure for the plague of parameters: Constraining  
721 models of complex population dynamics with allometries. *Proc. R. Soc. B Biol. Sci.*  
722 **280**, (2013).
- 723 20. Berlow, E. L. *et al.* Simple prediction of interaction strengths in complex food webs.  
724 *Proc. Natl. Acad. Sci.* **106**, 187–191 (2009).
- 725 21. Schneider, F. D., Scheu, S. & Brose, U. Body mass constraints on feeding rates  
726 determine the consequences of predator loss. *Ecol. Lett.* **15**, 436–443 (2012).
- 727 22. Jonsson, T., Kaartinen, R., Jonsson, M. & Bommarco, R. Predictive power of food  
728 web models based on body size decreases with trophic complexity. *Ecol. Lett.* **21**,  
729 702–712 (2018).
- 730 23. Valdovinos, F. S. Mutualistic networks: moving closer to a predictive theory. *Ecol.*  
731 *Lett.* (2019). doi:10.1111/ele.13279
- 732 24. Bronstein, J. L. *Mutualism*. (Oxford University Press, USA, 2015).
- 733 25. Chomicki, G., Weber, M., Antonelli, A., Bascompte, J. & Kiers, E. T. The Impact of  
734 Mutualisms on Species Richness. *Trends Ecol. Evol.* **34**, 698–711 (2019).
- 735 26. Ramula, S., Paige, K. N., Lennartsson, T. & Tuomi, J. Overcompensation: a 30-year  
736 perspective. *Ecology* **100**, 1–6 (2019).
- 737 27. Abrams, P. A. When does greater mortality increase population size? the long  
738 history and diverse mechanisms underlying the hydra effect. *Ecol. Lett.* **12**, 462–474  
739 (2009).

- 740 28. Rosenzweig, M. L. & MacArthur, R. H. Graphical Representation and Stability  
741 Conditions of Predator-Prey Interactions. *Am. Nat.* **97**, 209–223 (1963).
- 742 29. Holland, N. J. & DeAngelis, D. L. A consumer–resource approach to the density-  
743 dependent population dynamics of mutualism. *Ecology* **91**, 1286–1295 (2010).
- 744 30. Valdovinos, F. S., Moisset de Espanés, P., Flores, J. D. & Ramos-Jiliberto, R.  
745 Adaptive foraging allows the maintenance of biodiversity of pollination networks.  
746 *Oikos* **122**, 907–917 (2013).
- 747 31. Valdovinos, F. S. *et al.* Niche partitioning due to adaptive foraging reverses effects  
748 of nestedness and connectance on pollination network stability. *Ecol. Lett.* **19**,  
749 (2016).
- 750 32. Ringel, M. S., Hu, H. H. & Anderson, G. The stability and persistence of mutualisms  
751 embedded in community interactions. *Theor. Popul. Biol.* **50**, 281–297 (1996).
- 752 33. Ings, T. C. *et al.* Ecological networks - Beyond food webs. *J. Anim. Ecol.* **78**, 253–  
753 269 (2009).
- 754 34. Piloşof, S., Porter, M. A., Pascual, M. & Kéfi, S. The multilayer nature of ecological  
755 networks. *Nat. Ecol. Evol.* **1**, 1–9 (2017).
- 756 35. Sauve, A. M. C., Thébault, E., Pocock, M. J. O. & Fontaine, C. How plants connect  
757 pollination and herbivory networks and their contribution to community stability.  
758 *Ecology* **97**, 908–917 (2016).
- 759 36. Kéfi, S. *et al.* Toward Multiplex Ecological Networks: Accounting for Multiple  
760 Interaction Types to Understand Community Structure and Dynamics. in *Adaptive*

- 761 *Food Webs: Stability and Transitions of Real and Model Ecosystems* (eds. Moore, J.  
762 C., de Ruiter, P. C., McCann, K. S. & Wolters, V.) 73 (Cambridge University Press,  
763 2017).
- 764 37. Tylianakis, J. M. Understanding the web of life: The birds, the bees, and sex with  
765 aliens. *PLoS Biol.* **6**, 0224–0228 (2008).
- 766 38. Saunders, M. E., Peisley, R. K., Rader, R. & Luck, G. W. Pollinators, pests, and  
767 predators: Recognizing ecological trade-offs in agroecosystems. *Ambio* **45**, 4–14  
768 (2016).
- 769 39. Sauve, A. M. C., Fontaine, C. & Thébault, E. Structure-stability relationships in  
770 networks combining mutualistic and antagonistic interactions. *Oikos* **123**, 378–384  
771 (2014).
- 772 40. García-Callejas, D., Molowny-Horas, R. & Araújo, M. B. The effect of multiple  
773 biotic interaction types on species persistence. *Ecology* **99**, 2327–2337 (2018).
- 774 41. Mougi, A. & Kondoh, M. Diversity of interaction types and ecological community  
775 stability. *Science* **337**, 349–351 (2012).
- 776 42. Kondoh, M. & Mougi, A. Interaction-type diversity hypothesis and interaction  
777 strength: the condition for the positive complexity-stability effect to arise. *Popul.*  
778 *Ecol.* **57**, 21–27 (2015).
- 779 43. Suweis, S., Grilli, J. & Maritan, A. Disentangling the effect of hybrid interactions  
780 and of the constant effort hypothesis on ecological community stability. *Oikos* **123**,  
781 525–532 (2014).

- 782 44. Marquet, P. A. *et al.* On theory in ecology. *Bioscience* **64**, 701–710 (2014).
- 783 45. García-Callejas, D., Molowny-Horas, R. & Araújo, M. B. Multiple interactions  
784 networks: towards more realistic descriptions of the web of life. *Oikos* **127**, 5–22  
785 (2018).
- 786 46. Holland, N. J. & Deangelis, D. L. Consumer-resource theory predicts dynamic  
787 transitions between outcomes of interspecific interactions. *Ecol. Lett.* **12**, 1357–1366  
788 (2009).
- 789 47. McPeck, M. A. Mechanisms influencing the coexistence of multiple consumers and  
790 multiple resources: resource and apparent competition. *Ecol. Monogr.* **89**, 1–22  
791 (2019).
- 792 48. Williams, R. J. & Martinez, N. D. Simple rules yield complex food webs. *Nature*  
793 **404**, 180–183 (2000).
- 794 49. Thébault, E. & Fontaine, C. Stability of ecological communities and the architecture  
795 of mutualistic and trophic networks. *Science* **329**, 853–856 (2010).
- 796 50. Kéfi, S. *et al.* Advancing our understanding of ecological stability. *Ecol. Lett.* 1349–  
797 1356 (2019). doi:10.1111/ele.1334
- 798 51. Martinez, N. D. *et al.* Sustaining Economic Exploitation of Complex Ecosystems in  
799 Computational Models of Coupled Human-Natural Networks. in *Proceedings of the*  
800 *National Conference on Artificial Intelligence* **1**, 326–334 (2012).
- 801 52. Brandenburg, A., Kuhlemeier, C. & Bshary, R. Hawkmoth pollinators decrease seed  
802 set of a low-nectar petunia axillaris line through reduced probing time. *Curr. Biol.*

- 803           **22**, 1635–1639 (2012).
- 804   53.   Holland, J. N., DeAngelis, D. L. & Bronstein, J. L. Population Dynamics and  
805           Mutualism: Functional Responses of Benefits and Costs. *Am. Nat.* **159**, 231–244  
806           (2002).
- 807   54.   Klein, A. M., Steffan-Dewenter, I. & Tschamntke, T. Fruit set of highland coffee  
808           increases with the diversity of pollinating bees. *Proc. R. Soc. B Biol. Sci.* **270**, 955–  
809           961 (2003).
- 810   55.   Hoehn, P., Tschamntke, T., Tylianakis, J. M. & Steffan-Dewenter, I. Functional group  
811           diversity of bee pollinators increases crop yield. *Proc. R. Soc. B Biol. Sci.* **275**,  
812           2283–2291 (2008).
- 813   56.   Winfree, R. & Kremen, C. Are ecosystem services stabilized by differences among  
814           species? A test using crop pollination. *Proc. R. Soc. B Biol. Sci.* **276**, 229–237  
815           (2009).
- 816   57.   Rogers, S. R., Tarpy, D. R. & Burrack, H. J. Bee species diversity enhances  
817           productivity and stability in a perennial crop. *PLoS One* **9**, (2014).
- 818   58.   Levin, S. A. The Problem of Pattern and Scale in Ecology. *Ecology* **73**, 1943–1967  
819           (1992).
- 820   59.   Novak, M. *et al.* Characterizing Species Interactions to Understand Press  
821           Perturbations: What Is the Community Matrix? *Annu. Rev. Ecol. Evol. Syst.* **47**, 409–  
822           432 (2016).
- 823   60.   Hart, S. P., Freckleton, R. P. & Levine, J. M. How to quantify competitive ability. *J.*

- 824 *Ecol.* **106**, 1902–1909 (2018).
- 825 61. Brown, H., Gillooly, J. F., Allen, A. P., Savage, V. M. & West, G. B. Toward a  
826 metabolic theory of ecology. *Ecology* **85**, 1771–1789 (2004).
- 827 62. Baude, M. *et al.* Historical nectar assessment reveals the fall and rise of floral  
828 resources in Britain. *Nature* **530**, 85–88 (2016).
- 829 63. Adgaba, N. *et al.* Nectar secretion dynamics and honey production potentials of  
830 some major honey plants in Saudi Arabia. *Saudi J. Biol. Sci.* **24**, 180–191 (2017).
- 831 64. Simanonok, M. P. & Burkle, L. A. Partitioning interaction turnover among alpine  
832 pollination networks: Spatial, temporal, and environmental patterns. *Ecosphere* **5**, 1–  
833 17 (2014).
- 834 65. Kath, N. J., Boit, A., Guill, C. & Gaedke, U. Accounting for activity respiration  
835 results in realistic trophic transfer efficiencies in allometric trophic network (ATN)  
836 models. *Theor. Ecol.* **11**, 453–463 (2018).
- 837 66. Shepon, A., Eshel, G., Noor, E. & Milo, R. Energy and protein feed-to-food  
838 conversion efficiencies in the US and potential food security gains from dietary  
839 changes. *Environ. Res. Lett.* **11**, (2016).
- 840 67. Kéfi, S., Miele, V., Wieters, E. A., Navarrete, S. A. & Berlow, E. L. How Structured  
841 Is the Entangled Bank? The Surprisingly Simple Organization of Multiplex  
842 Ecological Networks Leads to Increased Persistence and Resilience. *PLoS Biol.* **14**,  
843 1–21 (2016).
- 844 68. Kuparinen, A., Boit, A., Valdovinos, F. S., Lassaux, H. & Martinez, N. D. Fishing-

845 induced life-history changes degrade and destabilize harvested ecosystems. *Sci. Rep.*  
846 **6**, (2016).

847 69. Kuparinen, A., Perälä, T., Martinez, N. D. & Valdovinos, F. S. Environmentally-  
848 induced noise dampens and reddens with increasing trophic level in a complex food  
849 web. *Oikos* 1–13 (2018). doi:10.1111/oik.05575

850 70. Dunne, J. A. *et al.* Parasites Affect Food Web Structure Primarily through Increased  
851 Diversity and Complexity. *PLoS Biol.* **11**, (2013).

852 71. Williams, R. J. & Martinez, N. D. Stabilization of chaotic and non-permanent food-  
853 web dynamics. *Eur. Phys. J. B* **38**, 297–303 (2004).

854 72. Williams, R. J. Effects of network and dynamical model structure on species  
855 persistence in large model food webs. *Theor. Ecol.* **1**, 141–151 (2008).

856 73. Williams, R. J. & Martinez, N. D. Limits to Trophic Levels and Omnivory in  
857 Complex Food Webs: Theory and Data. *Am. Nat.* **163**, 458–468 (2004).

858 74. MathWorks. MATLAB version R2018b. (2018).

859 75. Institute, S. A. S. *Using JMP 14*. (SAS Institute Inc., 2018).

860

## 861 ACKNOWLEDGEMENTS

862 We thank Nicholas J. Kappler for critical insight on our dynamical model. This research  
863 was supported by National Science Foundation Graduate Research Fellowship DGE-  
864 1143953 to KRS, National Science Foundation grant DEB-1834497 to FSV, and



865 Department of Energy grant DE-SC0016247 and National Science Foundation grants

866 1241253, 1313830, 1642894, 1754207 and 1934817 to NDM.

867

868 **Table 1. Definitions of terms.**

|                                      |                                                                                                                                                                                                                                                                                                                                                                                                                                                                                                                                                                                                                                                                                                                                                                                                                                                                                                                                                                                                                                                                                                |
|--------------------------------------|------------------------------------------------------------------------------------------------------------------------------------------------------------------------------------------------------------------------------------------------------------------------------------------------------------------------------------------------------------------------------------------------------------------------------------------------------------------------------------------------------------------------------------------------------------------------------------------------------------------------------------------------------------------------------------------------------------------------------------------------------------------------------------------------------------------------------------------------------------------------------------------------------------------------------------------------------------------------------------------------------------------------------------------------------------------------------------------------|
| Ecosystem "Stability" and "Function" | We use a range of complementary metrics to assess ecosystem “stability” and “function” in a broad sense <sup>50</sup> . We apply the metrics both to the whole <b>ecosystem</b> (all species in the network) and to individual <b>guilds</b> in the network at <b>steady-state dynamics</b> of our simulations.                                                                                                                                                                                                                                                                                                                                                                                                                                                                                                                                                                                                                                                                                                                                                                                |
| Biomass Variability (CVs)            | <b>Coefficient of Variation</b> (CV = standard deviation / mean) of species’ or guilds’ biomass evaluated over the last 1000 timesteps of the simulations when their dynamics are approximately at <b>steady state</b> . Increased <b>temporal stability</b> corresponds to decreased biomass variability.                                                                                                                                                                                                                                                                                                                                                                                                                                                                                                                                                                                                                                                                                                                                                                                     |
| Consumption Rate                     | Total rates of biomass extracted by consumers.                                                                                                                                                                                                                                                                                                                                                                                                                                                                                                                                                                                                                                                                                                                                                                                                                                                                                                                                                                                                                                                 |
| Diversity                            | Number of species within a network. Networks of <b>initial diversity</b> $S$ are subjected to the dynamical simulations, during which species may go extinct or persist. The resulting number of species is the <b>final diversity</b> , or simply <b>diversity</b> .                                                                                                                                                                                                                                                                                                                                                                                                                                                                                                                                                                                                                                                                                                                                                                                                                          |
| Guilds                               | Guilds are groups of “species” with similar consumer-resource interactions: <b>plants without pollinators</b> ; <b>plants with pollinators</b> ; <b>floral rewards</b> of plants with pollinators (when relevant to analyze their biomass and flows separately from vegetation, Fig. 1); <b>herbivores</b> : species that only eat plant vegetation in the original niche-model food web (Fig. 2a); <b>omnivores</b> : species that eat vegetation and animals in the original niche-model food web (Fig. 2a); <b>carnivores</b> : species that eat only animals; <b>added (+) herbivores/pollinators</b> : herbivores or herbivorous pollinators added by the RO or RP treatments that consume rewards (multiplex treatments) and/or vegetation (FW treatments; Fig. 2, yellow-green nodes); <b>added (+) omnivores/pollinators</b> : omnivores or omnivorous pollinators added by the RP treatment that consume rewards (multiplex treatment), animals, and/or vegetation (Fig. 2e, orange nodes). “ <b>Added animals</b> ” include both +herbivores/pollinators and +omnivores/pollinators. |
| Local Stability                      | Categorizes the behavior of a system around an equilibrium point as “locally stable” if the system tends to return to that equilibrium after a very small perturbation <sup>4</sup> .                                                                                                                                                                                                                                                                                                                                                                                                                                                                                                                                                                                                                                                                                                                                                                                                                                                                                                          |
| Persistence                          | Fraction of species that survive to the end of simulations (= initial diversity / final diversity).                                                                                                                                                                                                                                                                                                                                                                                                                                                                                                                                                                                                                                                                                                                                                                                                                                                                                                                                                                                            |
| Productivity                         | Total rates of biomass increase due to plant growth and food assimilated by animals minus loss due to animals’ metabolic maintenance costs and plants’ costs of producing rewards.                                                                                                                                                                                                                                                                                                                                                                                                                                                                                                                                                                                                                                                                                                                                                                                                                                                                                                             |
| Steady-State Dynamics                | Formally, dynamics in which all species have constant abundance ( $dB_i/dt = dR_i/dt = 0$ for all $i$ ). At the end of 5000 timesteps, our systems <i>approximate</i> steady-state dynamics (Fig. 3) as quantified by very small variability in total ecosystem biomass over the last 1000 timesteps of the simulations (CVs < 0.0001).                                                                                                                                                                                                                                                                                                                                                                                                                                                                                                                                                                                                                                                                                                                                                        |

|                                                    |                                                                                                                                                                                                                                                                                                                                                                                                                                                                                                                                                    |
|----------------------------------------------------|----------------------------------------------------------------------------------------------------------------------------------------------------------------------------------------------------------------------------------------------------------------------------------------------------------------------------------------------------------------------------------------------------------------------------------------------------------------------------------------------------------------------------------------------------|
| Multiplex Networks                                 | Ecological networks that include more than one type of species interaction. Here, we focus on multiplex networks that combine food webs (including carnivory and herbivory, Fig. 2a) and pollination networks (Fig. 2b).                                                                                                                                                                                                                                                                                                                           |
| Rewards Only (RO) Treatment                        | Network construction treatment in which pollinators can access floral rewards of plants w/ pollinators as their only resource (Fig. 2d). These networks are subjected to multiplex dynamics, which include pollination in addition to traditional food web dynamics.                                                                                                                                                                                                                                                                               |
| Rewards Plus (RP) Treatment                        | Network construction treatment in which pollinators can access floral rewards plus plant vegetation and/or animal biomass resources (Fig. 2e). These networks are subjected to multiplex dynamics, which include pollination in addition to traditional food web dynamics.                                                                                                                                                                                                                                                                         |
| Pollination Link <i>or</i> Mutualistic Interaction | A pollination link or mutualistic interaction between pollinator $i$ and plant w/ pollinator $j$ describes both the consumption of $j$ 's floral rewards by $i$ and the reproductive services provisioning to the vegetative growth rate of $j$ by $i$ (Fig. 1). In the FW treatments, pollination links are switched to links in which $i$ consumes the vegetative biomass of $j$ , i.e. to herbivory links.                                                                                                                                      |
| Food Web (FW) Treatments                           | Ecological networks with the same structure as multiplex networks, but with all <b>pollination links</b> switched to herbivory (also corresponding to zero rewards productivity). In the Rewards Only Food Web (RO FW) construction, animal $i$ is strictly an herbivore (Fig. 2d), while in the Rewards Plus Food Web (RP FW) construction, animal $i$ could be an omnivore or herbivore (Fig. 2e). These networks are subjected to traditional food web dynamics.                                                                                |
| Rewards Productivity ( $\beta$ )                   | Parameter in our multiplex model specifying the rate of rewards biomass produced by plants w/ pollinators per unit of their vegetative biomass. "Low" ( $\beta = 0.2$ ) and "High" ( $\beta = 1.0$ ) are arbitrary values chosen to illustrate two behaviors of the multiplex model compared to traditional food web dynamics. "None" corresponds to Food Web treatments. We interpret rewards productivity as a proxy for the <b>intensity</b> of pollination interactions. See Fig. S5 for persistence results across a range of $\beta$ values. |
| Feedback Control                                   | To test whether transient mutualistic feedbacks isolated from rewards availability lead to the differences between our multiplex and Food Web treatments, we initialized simulations forced with rewards availability from multiplex simulations but with feedbacks (blue arrows in Fig. 1) turned "off." We then observed potential changes in steady-state ecosystem stability and function.                                                                                                                                                     |

## 870 **Figure Legends**

871 **Figure 1. Interaction mechanisms in the multiplex model.** Interspecific and  
872 intraspecific mechanisms of feeding and reproduction combine to describe pollination  
873 mutualisms and traditional trophic interactions. Biomass of plants with pollinators is  
874 partitioned into two pools, vegetation (blue node) and floral rewards (purple node), coupled  
875 by intraspecific dynamic feedbacks (dotted arrows). Rewards production is proportional to  
876 vegetative biomass but subject to self-limitation such that its productivity per unit biomass  
877 decreases with increasing rewards abundance. Producing rewards incurs costs (reduced  
878 vegetative productivity), which create tradeoffs between producing rewards to attract  
879 pollinators and benefiting from the *quantity* (number of visits measured as feeding rate on  
880 rewards) and *quality* (conspecific feeding / total feeding) of pollinators' reproductive  
881 services (blue arrow) that are required for vegetative production. At saturation,  
882 reproductive services allow plants with pollinators to potentially achieve a 25% higher per-  
883 biomass growth rate than that of plants without pollinators whose intrinsic growth rate is  
884 independent of consumers' behavior. All plants are also subjected to competition from the  
885 plant community in the form of a community-level carrying capacity, which reduces per-  
886 biomass vegetative growth rate as the plant community approaches its carrying capacity.  
887 Gray arrows show herbivores feeding on vegetation and pollinators feeding on rewards.

888 **Figure 2. Steps for constructing food-web and multiplex-network treatments.** Nodes  
889 are vertically arranged by trophic level with plant species at the bottom and carnivores at  
890 the top. All (grey, red, orange) links represent feeding by the consumer above the resource  
891 except the bi-directional pollination links (blue, simplified from Fig. 1) that represent  
892 pollinators consuming plants' floral rewards (e.g., nectar) and plants consuming

893 pollinators' reproductive services. **Steps:** **a)** Generate food web with diversity  $S_f$  and  
894 connectance  $C_f$ <sup>48</sup>. **b)** Generate plant-pollinator network with diversity  $S_p$  and connectance  
895  $C_p$ <sup>49</sup>. **c)** Integrate the food web and plant-pollinator network by adding pollinators and  
896 their links from b) to the food web in a) by randomly assigning plant species in a) to  
897 become the animal-pollinated plants in b). **d) Rewards Only (RO) treatments:** following  
898 a), b), and c), construct the RO multiplex treatment by stochastically linking predators of  
899 herbivores in c) to pollinators and then, for the RO FW treatment, transform pollinators into  
900 herbivores and plants with pollinators into plants without pollinators. **e) Rewards Plus**  
901 **(RP) treatments:** following a), b), and c), construct the RP multiplex treatment by  
902 stochastically linking predators and diets of herbivores and herbivorous omnivores in c) to  
903 pollinators and then, for the RP FW treatment, transform omnivorous and herbivorous  
904 pollinators and plants with pollinators into omnivores, herbivores, and plants without  
905 pollinators, respectively. Resulting diversity ( $S$ ) and connectance ( $C$ ) is shown under each  
906 network treatment (d–e). See Methods.

907 **Figure 3. Timeseries of a 72-species ecological network subjected to six treatments.**  
908 This example uses a 50-species niche-model food web integrated with a 33-species plant-  
909 pollinator network according to the Rewards Only (RO, top row) and Rewards Plus (RP,  
910 bottom row) network treatments subjected to traditional Food Web (FW) dynamics (left) or  
911 multiplex dynamics with Low (center) or High (right) rewards productivity. Note that 11  
912 plant species in the food web are chosen to represent the 11 plant species in the pollination  
913 network. Simulations last 5000 timesteps and are presented on log-log axes. Each line  
914 (colored by guild following Fig. 2) is the trajectory of a species' biomass over time.  
915 Species that fall below a biomass of  $10^{-4}$  continue to extinction ( $10^{-6}$ ). Resulting overall

916 persistence is labeled in the upper right corner of each panel. Plants with pollinators are  
917 considered extinct when their vegetative biomass (light blue) drops below  $10^{-6}$ ; their  
918 rewards biomass (purple) is strongly coupled and declines accordingly. The vast majority  
919 of species' biomasses achieve steady state by 2000 timesteps with nearly all animal  
920 extinctions occurring before then, while several low-abundance plants with pollinators  
921 continue slow declines well past 2000 timesteps.

922 **Figure 4. Overall effects of mutualism on stability and function in complex**  
923 **ecosystems.** Column headings label the treatments described in Fig. 3. Gray bars and  
924 associated  $\mu$ 's are means over all levels of initial diversity for all networks or "ecosystems"  
925 within each treatment at the end of  $N = 24,276$  simulations. Shown are the total a) diversity,  
926 b) persistence, c) biomass, d) productivity and consumption rates, and the mean CVs of  
927 biomass of all e) species within each ecosystem and f) guilds within each ecosystem  
928 averaged over all the ecosystems within each treatment. Black error bars show 95%  
929 confidence intervals. Mutualism is absent in Food Web (FW) treatments and present in  
930 corresponding multiplex treatments. Mutualisms are less intense in Low than in High  
931 rewards productivity treatments. Total rates of productivity and consumption were  
932 approximately equal (i.e. at steady-state, all production is being consumed) so they are  
933 shown in one row (d).

934 **Figure 5. Effects of increasing mutualism on diversity and persistence in complex**  
935 **ecosystems.** Colors represent guilds of species described in Fig. 2 and Table 1. Initial  
936 diversity ( $S$ ) on the x-axis and in a) describes the initial number of species in food webs  
937 plus added herbivores and omnivores in the Food Web (FW) treatments or pollinators in  
938 the multiplex treatments. Increasing  $S$  corresponds to both to an increasing *number* of

939 added (+) animals and to an increasing *fraction* of the 20 plants without pollinators that are  
940 assigned to be plants with pollinators, and thus to *increasing prevalence of mutualism* in  
941 multiplex treatments. Bars show mean values for networks of a given initial  $S$  in  
942 increments of 2 species. Stacked bar graphs show the mean number of species in each  
943 guild (colors) that contribute to a) initial or b) final ecosystem diversity. Persistence, the  
944 fraction of the initial diversity that persists to the end of the simulations, is shown for c) the  
945 entire ecosystem (i.e. network of species) and d-h) for each guild of animals. c) Error bars  
946 show standard deviations. d-h)  $\mu$  is the mean guild persistence over all  $N = 24,276$   
947 simulations in each treatment. Plants nearly always persist in our treatments (Fig. S1), so  
948 their persistence is not shown.

949 **Figure 6. Effects of increasing mutualism on diversity, abundance, function, and**  
950 **temporal stability in complex ecosystems.** Formatting follows Fig. 5 with the addition of  
951 floral rewards shown in purple. a) Final diversity from Fig. 5 is shown again for reference.  
952 Stacked bar graphs show the contribution of each guild (colors) to total ecosystem b)  
953 abundance, c) productivity, d) consumption, and average variability over time of e) species  
954 and f) guilds, with colors representing the average variability of the guild in f) or species  
955 within the guild in e). b) The community-wide carrying capacity for plant vegetative  
956 biomass ( $K$ ) is marked on the y-axis; total plant vegetative biomass (summed vegetation of  
957 plants with and without pollinators) does not exceed this value.

958

959 **Figure 1.**

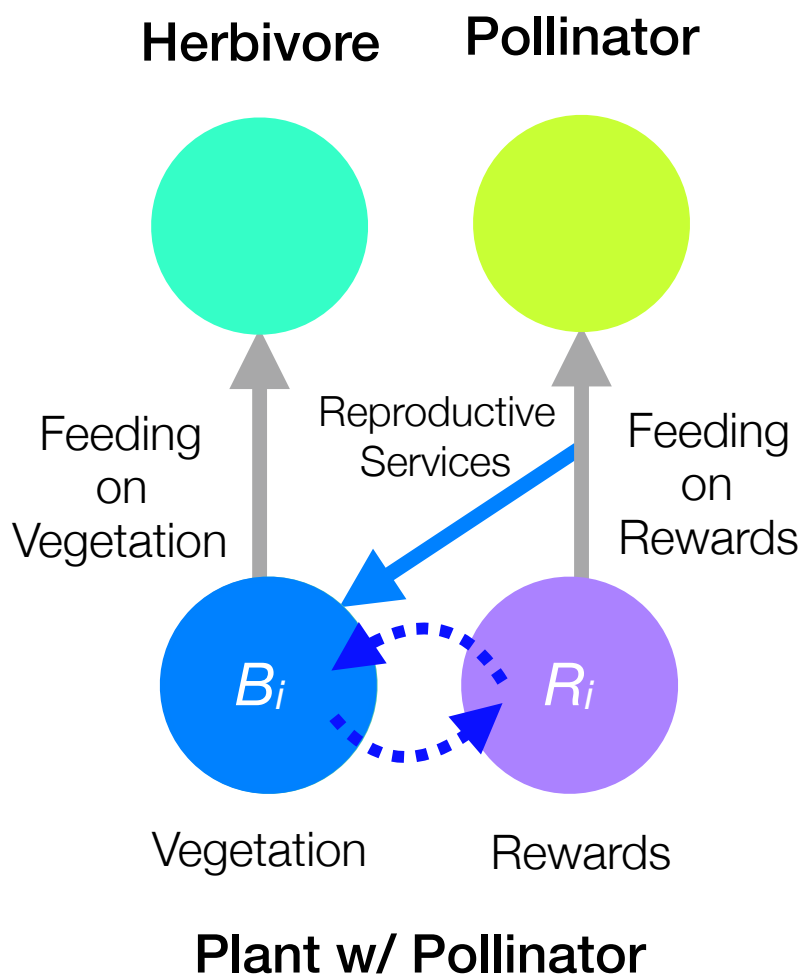

960

961



962 **Figure 2.**

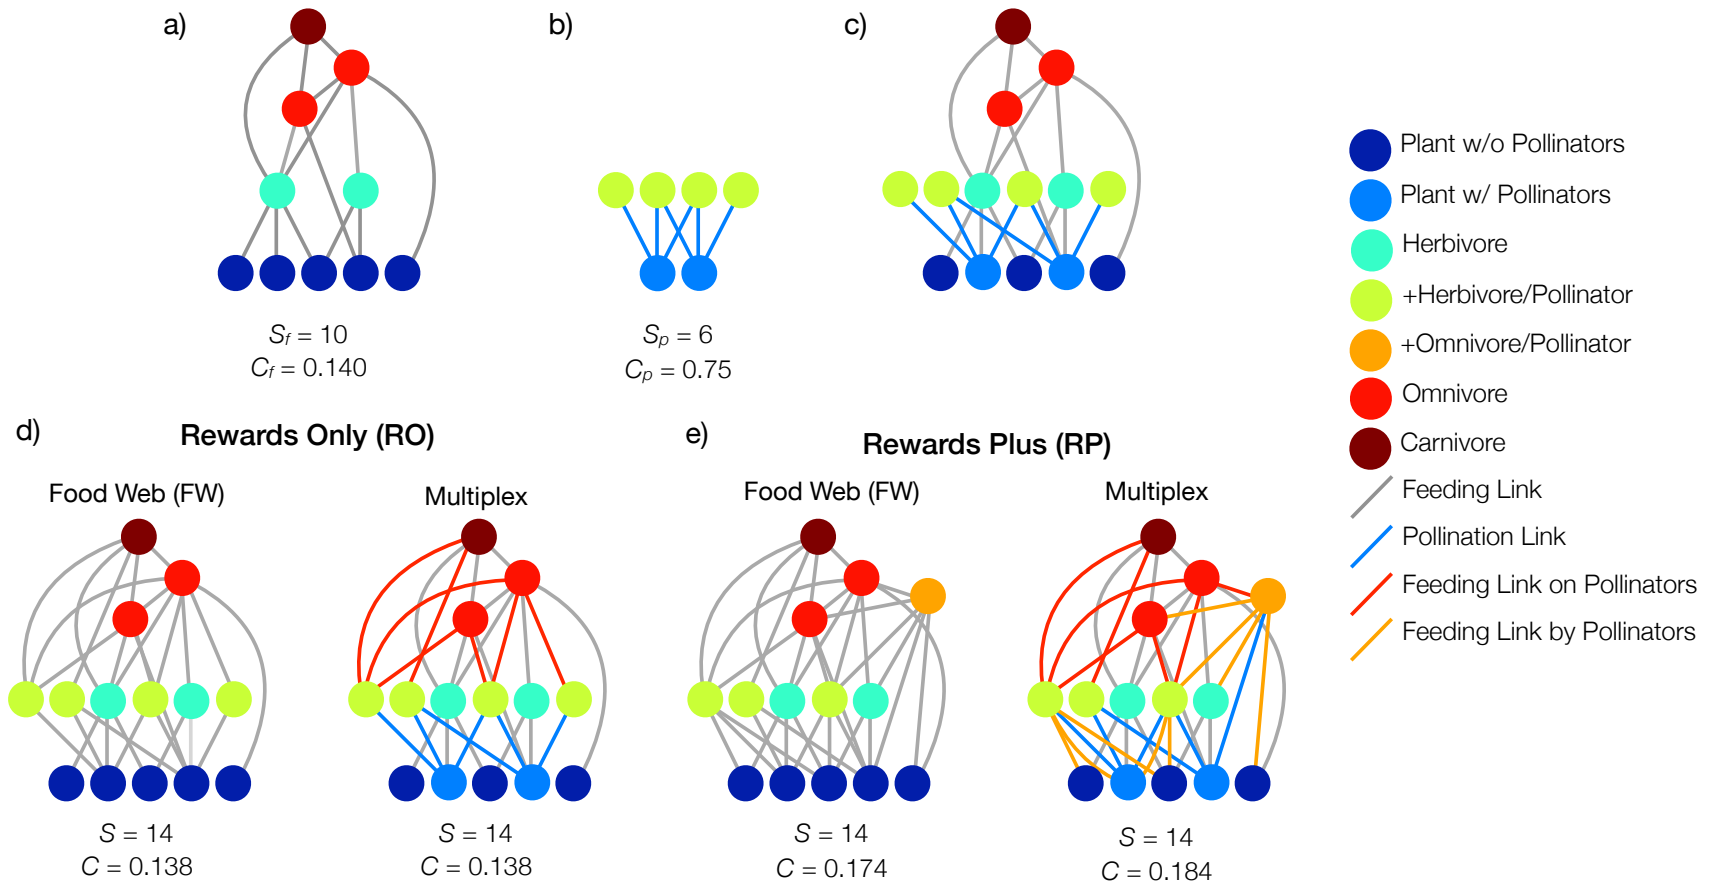

963

964 **Figure 3.**

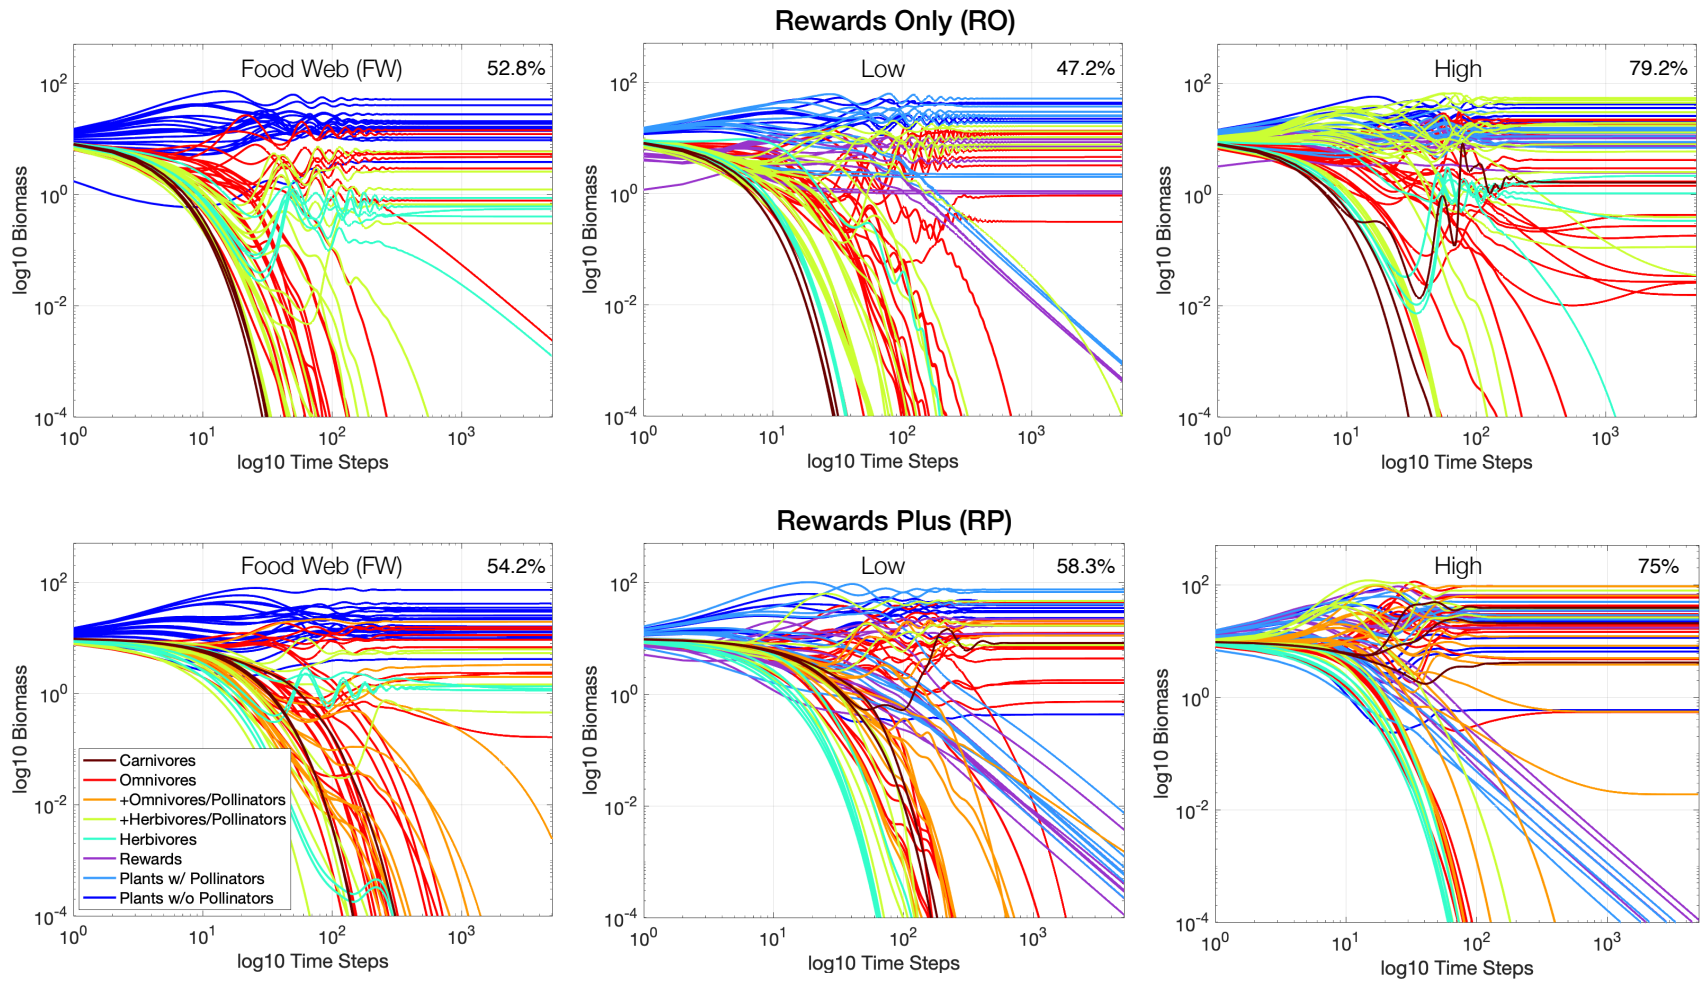

966 **Figure 4.**

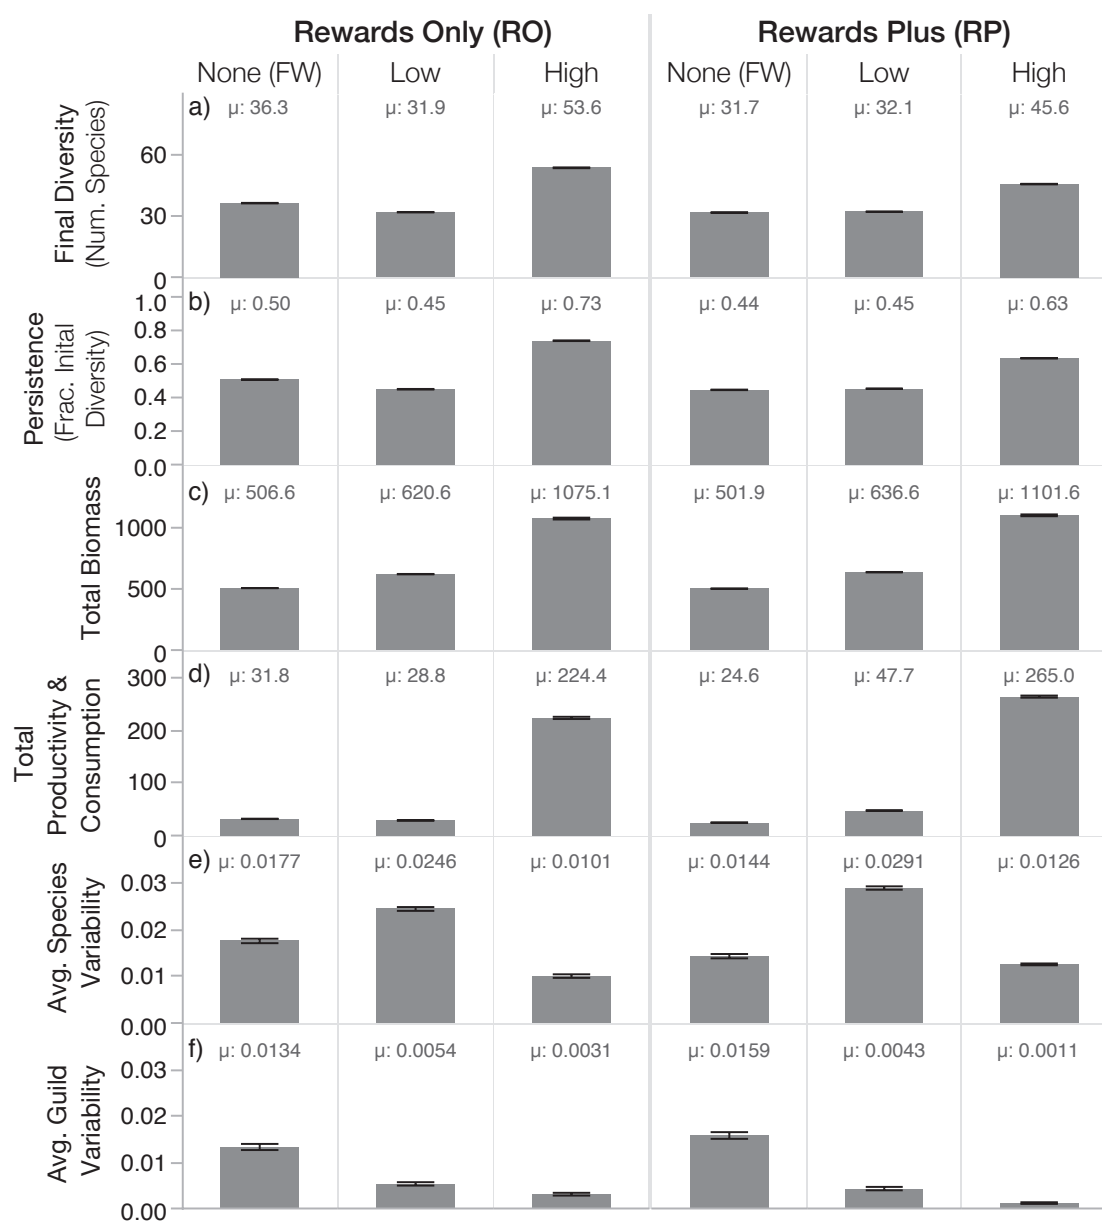

967

968

969

970 **Figure 5.**

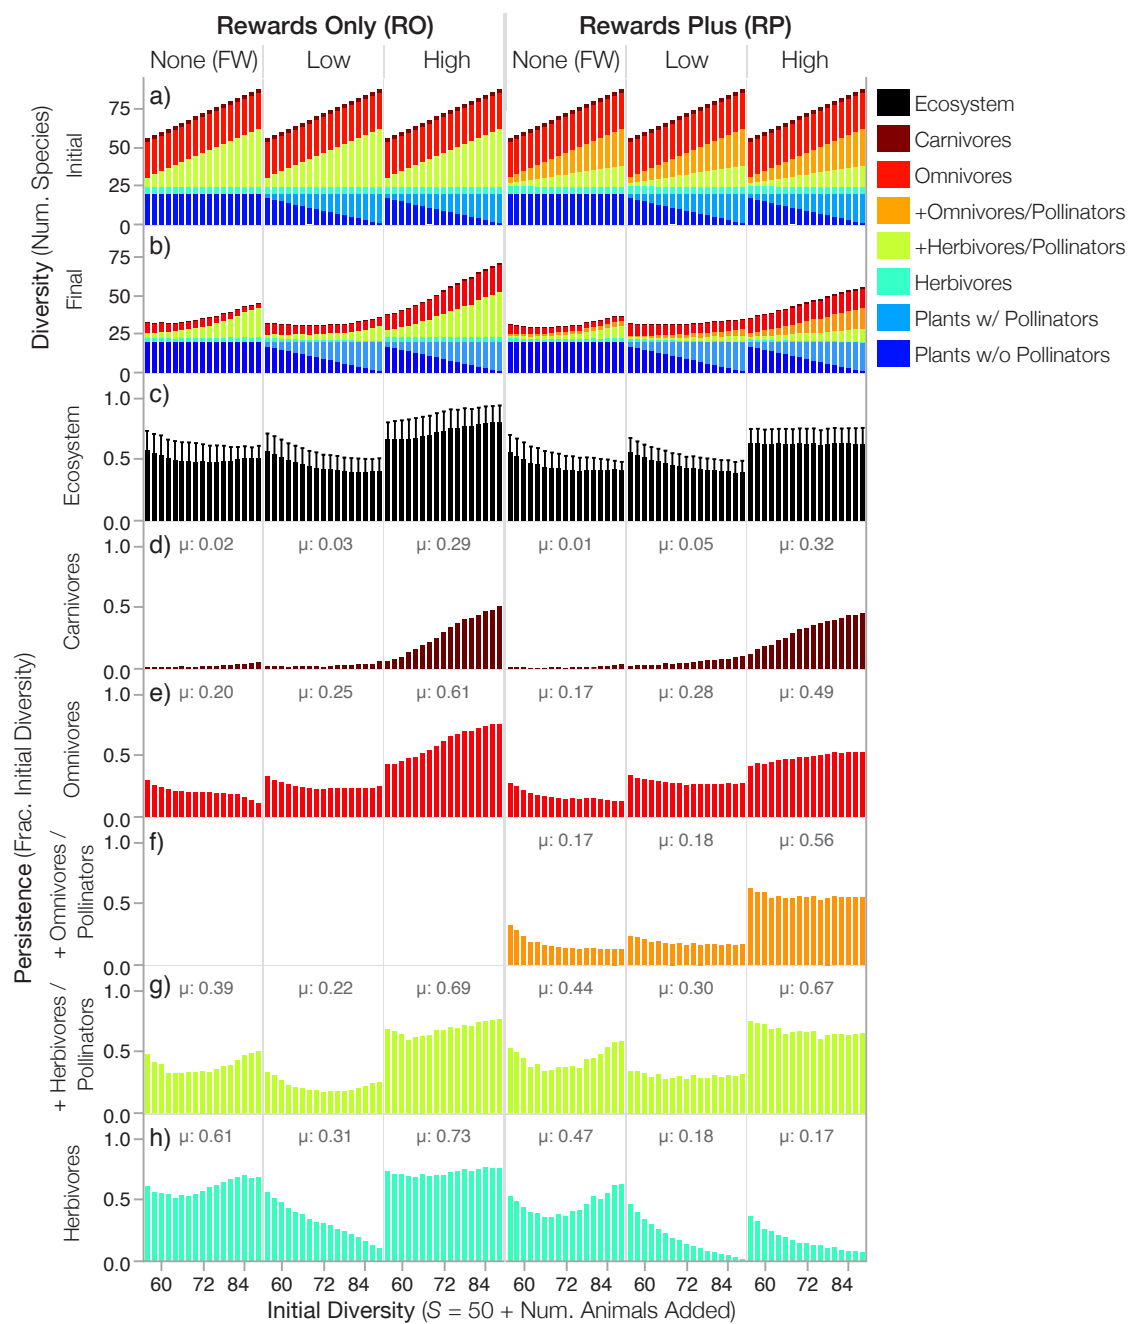

971

972

973

974 **Figure 6.**

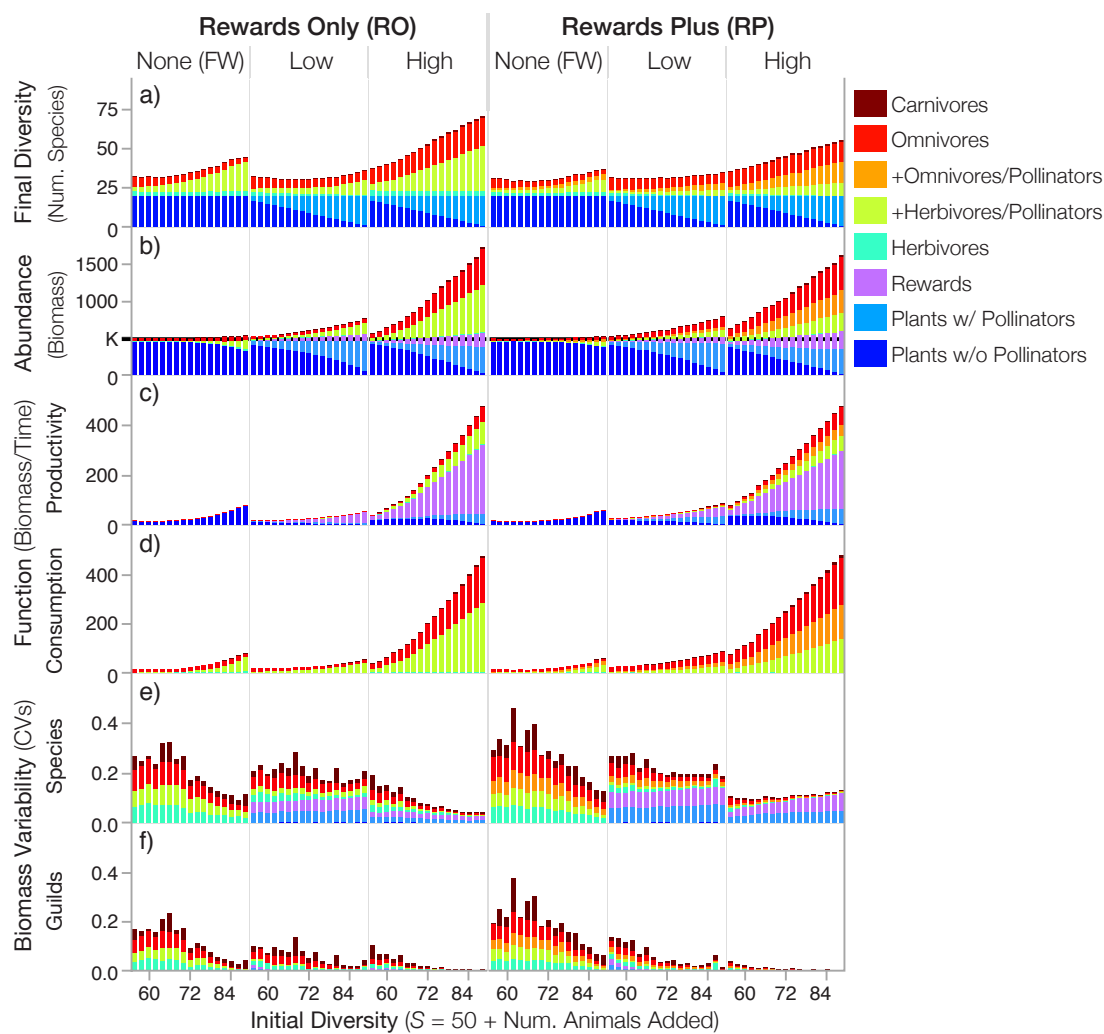

Source: https://www.biorxiv.org/content/10.1101/791707v2.full.pdf
